# Supplementary material for: Qualitative, exploratory pilot study to investigate how people living with posterior cortical atrophy, their carers and clinicians experience tests used to assess vision
Source: PubMed Central journal article supplement — BMJ Open. 2019 Mar 20;9(3):e020905. doi: 10.1136/bmjopen-2017-020905 (PMC6475252; doi:10.1136/bmjopen-2017-020905), 2019-03-20
Supplement: bmjopen-2017-020905.draft_revisions.pdf [file bmjopen-2017-020905.draft_revisions.pdf]

# BMJ Open

BMJ Open is committed to open peer review. As part of this commitment we make the peer review history of every article we publish publicly available.

When an article is published we post the peer reviewers' comments and the authors' responses online. We also post the versions of the paper that were used during peer review. These are the versions that the peer review comments apply to.

The versions of the paper that follow are the versions that were submitted during the peer review process. They are not the versions of record or the final published versions. They should not be cited or distributed as the published version of this manuscript.

BMJ Open is an open access journal and the full, final, typeset and author-corrected version of record of the manuscript is available on our site with no access controls, subscription charges or pay-per-view fees (<http://bmjopen.bmj.com>).

If you have any questions on BMJ Open's open peer review process please email [info.bmjopen@bmj.com](mailto:info.bmjopen@bmj.com)

# BMJ Open

## How do people with posterior cortical atrophy experience vision screening tests? A qualitative pilot study.

|                                 |                                                                                                                                                                                                                                                      |
|---------------------------------|------------------------------------------------------------------------------------------------------------------------------------------------------------------------------------------------------------------------------------------------------|
| Journal:                        | <i>BMJ Open</i>                                                                                                                                                                                                                                      |
| Manuscript ID                   | bmjopen-2017-020905                                                                                                                                                                                                                                  |
| Article Type:                   | Research                                                                                                                                                                                                                                             |
| Date Submitted by the Author:   | 01-Dec-2017                                                                                                                                                                                                                                          |
| Complete List of Authors:       | Bowen, Michael; The College of Optometrists, Research<br>Cordiner, Martin; The College of Optometrists,<br>Crutch, Sebastian; University College London Institute of Neurology<br>Shakespeare, Tim; University College London Institute of Neurology |
| <b>Primary Subject Heading</b>: | Mental health                                                                                                                                                                                                                                        |
| Secondary Subject Heading:      | Ophthalmology                                                                                                                                                                                                                                        |
| Keywords:                       | MENTAL HEALTH, Neuro-ophthalmology < OPHTHALMOLOGY, PRIMARY CARE                                                                                                                                                                                     |
|                                 |                                                                                                                                                                                                                                                      |

SCHOLARONE™  
Manuscripts

Peer Review Only

1  
2  
3 **How do people with posterior cortical atrophy experience vision screening tests? A**  
4 **qualitative pilot study.**  
5

6 **Authors:**

7 Michael Bowen<sup>1</sup>, Martin Cordiner<sup>1</sup>, Sebastian Crutch<sup>2</sup>, Tim Shakespeare<sup>2</sup>  
8

9 <sup>1</sup> The College of Optometrists, London, UK

10 <sup>2</sup> Dementia Research Centre, University College London, UK  
11

12 **Funding statement:**

13 This work was funded by the College of Optometrists and University College London.  
14

15 **Competing interests statement:**

16 None of the authors had any competing interests in relation to this work.  
17

18 **Corresponding author:**

19 Martin Cordiner ([martin.cordiner@college-optometrists.org](mailto:martin.cordiner@college-optometrists.org))  
20  
21

22 **Data sharing statement:**

23 The unedited transcripts of the interviews are held by the College. They are not currently  
24 publicly available.  
25  
26  
27  
28  
29  
30  
31  
32  
33  
34  
35  
36  
37  
38  
39  
40  
41  
42  
43  
44  
45  
46  
47  
48  
49  
50  
51  
52  
53  
54  
55  
56  
57  
58  
59  
60

## Abstract

**Purpose:** Posterior cortical atrophy (PCA) involves progressive visual dysfunction and a degeneration of the posterior brain's outer layer (the cortex). The complexities of both diagnosing PCA and ascertaining the best sight possible for people with the condition led to this project to gather pilot data from people with PCA, as well as eye health professionals, about the experience of having their vision and eye health assessed in a primary care setting. In particular, it aimed to answer the research questions, how are various tests used to assess vision experienced by people living with posterior cortical atrophy, and are there particular tests for assessing vision that are more effective at discriminating between cortical vision problems and vision problems related to optical or ocular causes?

**Methods:** In February 2016, three people with PCA completed three sequential assessments with an optometrist, ophthalmologist and neurologist, with their partner in attendance. After each assessment, the patient participant and their partner completed a brief interview, as did each clinician. A focus group was then held for the health professionals involved (as well as one other ophthalmologist invitee) in March 2016, to analyse selected footage and discuss a schedule of questions developed by the study team.

**Results:** Simple, short tests were thought to be more effective than more subjective tests, and patient fatigue and frustration was a factor. Patients and carers made clear the importance of early identification of PCA, and that current levels of understanding of the condition amongst the many health professionals involved was sometimes preventing this. Additional screening tests could be trialled in future research to measure their effectiveness.

**Conclusions:** Although limited in scope and execution, the project supports existing evidence that there are suitable eye examination tests that people with dementia can engage with and complete.

### Strengths and limitations of this study

- Small sample of patients took part in the study.
- Project might have benefited from a wider range of screening tests being used, although this might not have been feasible within the logistical limits of the project.
- Undertaken outside of usual clinical settings (due to multidiscipline approach), so patients might have performed differently in each discipline's normal clinical environment.
- Views on the experiences of both patients and practitioners in relation to each consultation captured separately, verbatim, and on the day the consultations were undertaken.
- Multidisciplinary approach, incorporating optometric, ophthalmological and neurological screening tests.

## Purpose

The purpose of this project was to gather pilot data from people with the posterior cortical atrophy form of dementia and eye health professionals about the experience of having vision and eye health assessed in a primary care setting. It was undertaken as a pilot in order to assess the technical and administrative feasibility of undertaking a number of different tests in succession with people with posterior cortical atrophy, and to be guided by patient and practitioner experience in beginning to home in on the most suitable tests to investigate within a larger project.

Posterior cortical atrophy (PCA) involves progressive visual dysfunction and a degeneration of the posterior brain's outer layer (the cortex). It is most commonly caused by Alzheimer's Disease, although may also be caused by dementia with Lewy bodies, corticobasal degeneration or Creutzfeldt–Jakob disease.

First described in 1988, consensus criteria for PCA have only recently been agreed (Crutch et al., 2017) and diagnosis is often delayed or absent. The fact that it often goes unrecognised means that a prevalence figure is hard to estimate (some studies have suggested about 5% of those diagnosed with early onset Alzheimer's Disease may have PCA). Most Alzheimer's disease cases appear in people over 65, but PCA tends to occur between 50 and 65.

Individuals with PCA offer a unique perspective on the visual difficulties which may be experienced by many individuals with typical Alzheimer's, at a point when the memory, language and insight problems of the latter group limit their ability to communicate what they are experiencing. Also, the nature of cortical visual problems in PCA can confound the use of standard optometric assessments. For example, the majority of PCA patients have normal or near-normal visual acuity, yet may struggle with a standard Snellen letter chart because of a reduced effective field of vision, and so can find it easier to read smaller, rather than larger, fonts. They may also struggle with excessive visual crowding in their central vision, resulting in difficulty reading letters surrounded by other letters or clutter, another common trait of optometric testing charts.

The complexities of both diagnosing PCA and ascertaining the best sight possible for people with the condition presented an opportunity for productive collaboration across the disciplines of optometry, ophthalmology, neurology and neuropsychology, to see how different tools fared against the following research questions:

- How are the various tests used to assess vision experienced by people living with posterior cortical atrophy?
- Are there particular tests for assessing vision that are more effective at discriminating between cortical vision problems and vision problems related to optical or ocular causes?

## Methods

### Participants

Vision testing and post-test interviews took place over the course of a day at University College London's (UCL) Dementia Research Centre at Queen Square in London, in February 2016. This location was selected as it was familiar to participants living with PCA, convenient to the clinicians participating, and had the scope to support the relevant equipment and filming required. A focus group was then held for the health professionals

involved (as well as one other ophthalmologist invitee) in March 2016, to analyse selected footage and discuss a schedule of questions developed by the study team.

The study used purposeful sampling, whereby suitable participants living with PCA were selected by the UCL team from the Rare Dementia Support PCA support group membership ([www.raredementiasupport.org](http://www.raredementiasupport.org)), based on their ability and willingness to attend and on the need to have participants with a range of PCA presentations. Due to the nature of PCA, the project aimed to include vision testing techniques from several different health care disciplines. This meant that the logistics of the testing and interview schedule (in particular the time taken to complete each stage) restricted the number of participants to three people with PCA (one male, two female, ages ranged from 67 to 78).

Participants with PCA were given an information sheet with brief details of the purpose and programme of the day - to gather data about the experience of having vision / eye health assessed by a range of clinicians. Each participant with PCA was accompanied by a family member throughout the processes of the day.

Three clinicians took part on the day - an optometrist, a neurologist and an ophthalmologist (one female and two male), and they were given briefing information about the testing they would be asked to carry out and the post-testing interviews.

The study conformed to the Declaration of Helsinki, and written consent to participate and for video recording and audio recording was obtained for all participants, prior to the examinations / interviews and focus groups. The study was approved by the Queen Square Research Ethics Committee.

## Procedure

Each patient participant completed three sequential assessments with an optometrist, ophthalmologist and neurologist, with their partner in attendance. After each assessment, the patient participant and their partner completed a brief interview, as did each clinician.

In advance of the testing day, semi-structured interview schedules were developed for the post-examination interviews with the clinicians and people with PCA. A group schedule of questions / topics for the clinicians' focus group in March was also produced, informed by the themes arising during the eye examinations and post-examination interviews.

The interview and focus group schedules were developed following initial discussions within the study team. The topics identified and included within the schedules served only as a guide for the interviews and focus group. The order in which topics were addressed in interviews was not rigidly applied and question wording was not prescribed in advance. Where considered helpful, prompts were used by the interviewer / focus group facilitator to introduce topics and to encourage participants to expand on their comments. However, the core of the discussion came from the participants and care was taken to use open questions and to avoid unduly leading the conversations.

Although the patient participants were aware that they were going to have their eyes examined by each of the clinicians, they were not made explicitly aware of the focus of the study being to identify how tests were experienced and whether any tests were particularly good or bad when being used with someone with PCA. All interviews, and the facilitation of the clinicians' focus group, were conducted by one of the investigators (HZ) who has

extensive experience of qualitative research, interviewing and focus group facilitation. The interviewer and participants had not met each other prior to the testing day, so introductions were made prior to the first interviews. In addition to the video recordings, the interviewer took field notes during the interviews. This note taking was intentionally kept to a minimum to enable the interviewer to attend as fully as possible to the interviews. During the focus group other members of the investigation team took notes to free the facilitator to focus on the discussion.

Each post-examination interview lasted around 5 minutes - these interviews were intentionally kept brief to manage the time / energy demands of a long day of testing for the participants. Each filmed examination session lasted approximately 20-30 minutes. The clinicians' focus group lasted for about three and a half hours, with a 15 minute break in the middle.

Consolidated Criteria for Reporting Qualitative Research (COREQ) guidelines were followed in the design and reporting of the study.

### Analysis

All sight tests / eye examinations and post-examination interviews were video recorded. The clinician focus group was audio recorded. The dialogue from the video and audio recordings was transcribed and reviewed by the investigators. In a small number of instances certain words were inaudible on the recordings, so field notes were used to account for any unclear information in those sections.

Data were analysed by two of the authors (MB and HZ) independently using framework analysis (Pope, Ziebland, Mays, 2000; Glen, Baker and Crabb, 2014) as shown in **Table 1**. An inductive approach was taken to coding and analysis. Each investigator read and re-read the transcripts and manually identified the key themes from the data. Once the investigators had both completed their independent theme identification, they met to review respective themes and organise the thematic framework, condensing and refining the categories that had been identified and identifying additional themes for exploration. Any differences of opinion regarding the relative importance of themes, or the meanings of sentences were discussed until a consensus was reached.

**Table 1: Framework technique used for data analysis.**

|                                          |                                                                                                                                                                     |
|------------------------------------------|---------------------------------------------------------------------------------------------------------------------------------------------------------------------|
| <b>1. Familiarisation</b>                | Manuscripts are read and re-read independently by investigators.                                                                                                    |
| <b>2. Identifying thematic framework</b> | Themes are identified and then reviewed jointly and a refined / condensed set of themes agreed on.                                                                  |
| <b>3. Coding / Indexing</b>              | Codes are applied to the data systematically by both investigators independently. Coding is then reviewed and discussed until final consensus on coding is reached. |
| <b>4. Charting</b>                       | Data is rearranged in line with thematic content in a manner that supports cross-case and within-case analysis.                                                     |
| <b>5. Mapping and interpretation</b>     | Data is interpreted and conclusions and recommendations drawn.                                                                                                      |

## Findings

Initial coding was completed according to the themes identified and agreed following stages 1 and 2 of the framework in Table 1. During coding additional themes were identified. There were also occasions where it became clear during the coding process that themes initially considered distinct were actually either a single theme or a theme and very closely linked sub-theme. Themes and sub-themes are summarised in **Figure 1**.

**Figure 1: Themes and sub-themes.**

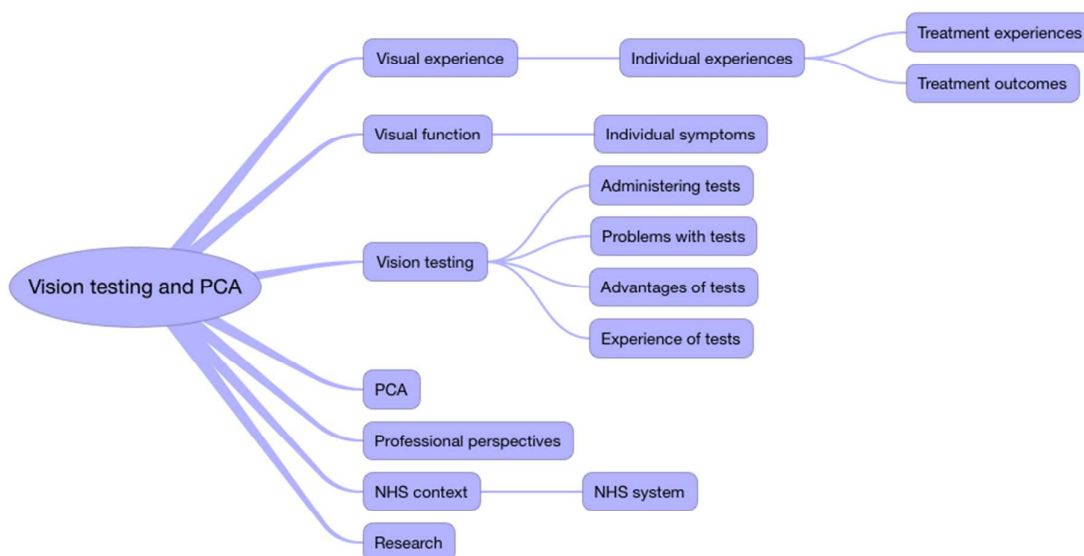

## Results

### The test experience

Clinicians reported that it was difficult to take a reliable history because of patient memory problems. They found that the simple, short tests worked the best. Tests that included too many variables were significantly less effective with this group of patients. Examples of less successful tests were the Amsler Grid and visual field analysis. Other optometric, ophthalmic and neurological tests were generally effective; however, more subjective tests such as colour vision, depth perception and visual acuity were more of a struggle for patients. A neurological test using full and fragmented letters or images (see Figure 2) appeared to offer potential as a screening test for PCA, giving clear-cut outcomes for patients with PCA. This type of test had the benefit of being short and simple.

**Figure 2: An example of a fragmented letter, in this case the letter 'A'.**



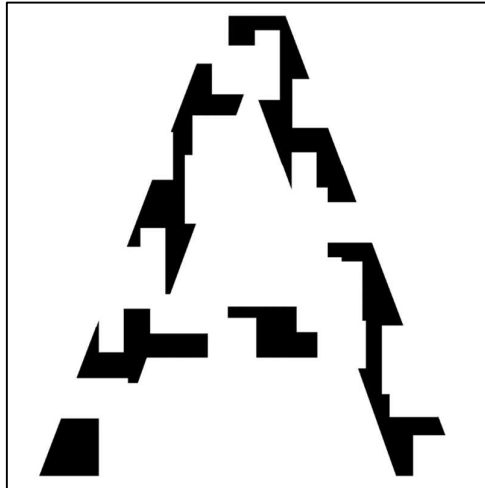

Clinicians noted that patients were affected by their involvement in one test after another. Fatigue was definitely a factor by the end of the day and within the test process. Patients would become more distracted, for example when their second eye was being tested. This meant that the time that testing took was significant. Too long and the patient may become too tired to continue without a break. Also, the testing process was particularly challenging for patients as it explored skills that they were once proficient in such as reading, but now find a struggle. Testing provided constant reminders of this.

*'All three patients attempted reading. This is challenging for the patients as it is an aspect of real life they are concerned about anyway. I also checked to see if using your finger as a guide helped with reading but it did not.'*  
(Clinician interview 12.2)

Patients gave two reasons why they had volunteered to be involved in the testing day. First, it was a chance to contribute to research into a greater understanding of PCA, as patients had had difficulties in gaining an accurate diagnosis of their condition in the first place. Second, it was a chance to find out more up-to-date information about how their disease was progressing and to check their vision.

Patients recognised that the testing was necessary, but they also found it uncomfortable and emotional at times, as it focused on what they were not able to do. As well as reporting tiredness, it could be experienced as physically unpleasant as well. Patient responses varied greatly across the tests. Some they found easy to do, some were difficult, while one or two they could not do at all. All patients reported positively on the clarity of explanation of the test elements by each clinician. They welcomed the fact that key information was repeated at intervals.

*It is as if I have been smacked in the face ... that sort of feeling that you get when you have blown your nose too hard or been hit in the nose. So that is a physical feeling. It's almost like little hooks being pulled around the eye, it's quite hard work.* (Patient interview 3.4)

Patients' partners played a vital role in the testing process. This role went beyond encouragement and support. It was about helping and prompting patients where they had memory lapses. They had shared patient frustrations when it had been difficult for clinicians

1  
2  
3 despite many tests to diagnose PCA in the first place. Patients could turn to their partners for  
4 assurance during the tests, which could be given simply as a nod of encouragement or the  
5 prompt of a correct word.  
6

7 *The real crux of it is to recognise the move from eyes to brain. I am not sure still from the*  
8 *sort of ophthalmic tests we had, which are fairly standard eye tests that even a competent*  
9 *ophthalmologist would pick up necessarily that it is a brain disorder, that it is to do with*  
10 *processing the information.*

11 (Partner comment in patient interview 6.8)  
12

### 13 **Diagnosing PCA**

14  
15 The clinicians reviewed their experience of working with patients with PCA. They argued that  
16 it is important to look at two different aspects, pre-diagnosis and post-diagnosis. Pre-  
17 diagnosis there were real concerns about a wide range of clinicians who could potentially be  
18 involved, but who may find it difficult to make a correct diagnosis. They could include  
19 optometrists, ophthalmologists, neurologists as well as GPs. If it was possible to develop a  
20 simple test or series of tests to give an indication that PCA may be involved, then this would  
21 be a significant step forwards and avoid a situation where patients visit a number of  
22 clinicians without anyone coming up with a firm diagnosis. This would also have potential for  
23 primary care settings as well. One clinician also thought it would be useful to involve  
24 orthoptists.  
25  
26

27 *They come in saying I've got a problem with my eyes, I can't see things and we do our*  
28 *examination and say, actually no, we can't really find any deficit at all, back you go to your*  
29 *GP and really the diagnosis would potentially be missed.*

30 (21 merged coding)  
31

32 *Post diagnosis it is still very important that the patient is able to access primary eye care*  
33 *so that they get monitoring of their general eye health and accurate correction of vision*  
34 *defects.*

35 (76 merged coding)  
36  
37

38  
39 For patients, trying to get an accurate diagnosis was critical. For one patient this took six  
40 years. Patients thought that they fell between different clinical disciplines, going from one to  
41 another with no definitive diagnosis. Patients often reported a number of common  
42 symptoms. These included not being able to read dot matrix signs in the underground or on  
43 buses, dislike of shiny surfaces and down escalators. A particular frustration was the ability  
44 to read, which might come and go in some patients, or be fully lost for others. One patient  
45 commented on how not being able to drive any longer had badly affected her.  
46

47 *I was constantly being bumped from pillar to post either at the hospital ophthalmic*  
48 *department or another trying to work out why I couldn't read properly and everything was*  
49 *falling off...things would slide off the page, I would say like icing off a cake.*

50 (Patient interview 3.9)  
51

52 Patients' partners also stressed the difficulty of gaining the PCA diagnosis, but recognised  
53 that it is a rare disease that is hard to identify. This was made worse by falling between  
54 different specialisms.  
55  
56  
57  
58  
59  
60

1  
2  
3 As a result of this, a key priority for patients and their partners was that diagnostic systems  
4 were in place to enable early identification of PCA. This meant that a consistent approach  
5 was needed across optometry, ophthalmology and neurology, with effective and prompt  
6 communication and referrals between clinicians. Partners and patients were vocal in their  
7 commitment to research projects such as this one and its importance in highlighting changes  
8 that could improve the patient experience, while also recognising that PCA was not  
9 straightforward and that it could be very difficult to diagnose. Once they had a diagnosis, it  
10 was vital that any eyesight problems were identified promptly and treated appropriately.  
11

12  
13 *I think probably what happens is you're falling between two disciplines; you're sort of*  
14 *being looked at by the neurologist and the ophthalmologist and they're not sort of linking...*  
15 *there almost needs to be a separate person in between who understands the neurology*  
16 *and the eye actions.*

17 (Partner comment in patient interview 4.10)

### 18 Learning from the tests

19  
20 Clinicians reviewed the learning from the project testing through detailed discussions in the  
21 focus group. There were a number of issues which emerged from this. Using a chart with  
22 lines of letters was far less effective than presenting patients with images of single letters.  
23 Multiple lines often caused patients to mix up letters on different lines. A simple test which  
24 contrasted full and fragmented images or letters was agreed to be the test that provided  
25 clearest evidence of PCA, or symptoms of other cortical vision problems, as patients could  
26 identify the full image but not the fragmented one. This worked with a letter or another object  
27 as the image. Another test was found to be to use photographs of common objects, but from  
28 unusual angles. Patients also experienced other unusual symptoms. For example, one said  
29 she could identify a small crumb on the floor but yet not see a glass on the table. One  
30 neurological test looked at visual disorientation. The patient was asked to grasp the  
31 clinician's finger, but was often unable to do so.  
32  
33

34  
35 *I ask patients to grab my finger. This can look like a field defect, but it is not. Patients can*  
36 *see the hand and can copy the hand movement, yet cannot locate the finger in space.*  
37 *There is an unusual visual field and visual disorientation.*

38 (Clinician interview 12.4)

39  
40 One clinician noted that it would be useful to include a routine slit lamp investigation with the  
41 tests. Another thought that it might be worth trying other field test approaches. Patients  
42 experienced particular problems with the visual field analysis. One patient could not see the  
43 light at all, while it came and went for another patient.  
44

45  
46 *Can you see the light?" and I had to say no, I couldn't. He said, "Can you tell me where*  
47 *the light is?" and I said, "What light?"*

48 (Patient interview 4.5)

49  
50 Patients and partners noted that there could be a cumulative effect of testing which involved  
51 things that they could not do, or skills they had lost. This increased fatigue and made  
52 concentration harder. Sometimes a break was needed.  
53

54  
55 Patients know that their own memories could be erratic and unreliable. They could have  
56 good and bad days. The test process needed to be flexible enough to accommodate these  
57  
58  
59

1  
2  
3 different patient responses and needed to take account of their fatigue and frustration with  
4 not being able to do things that were once normal everyday skills.  
5

6 Two of the clinicians indicated that they had greater confidence in running tests for people  
7 with PCA after the testing with the three patients. They both had experience of previous  
8 patients where it was harder to carry out testing. The clinicians were interested to discuss  
9 how what they had learnt from the research could be put into practice within their own work  
10 settings. Making changes such as splitting testing into two parts could help to alleviate some  
11 of the fatigue and distraction. This would not just apply to PCA patients, but also those with  
12 other forms of dementia.  
13

14 The optometrist raised the issue of the length of the average sight test during a standard  
15 day's practice. The traditional 20 minute test was clearly insufficient for what was involved.  
16 She found a good pattern was to alternate 30 minute and 45 minute tests, allowing scope for  
17 patients with more complex needs (56/57 merged coding).  
18

19 Discussions between clinicians reflected patient concerns about the time that it took to get a  
20 correct diagnosis of PCA. Some issues reflected wider problems about the lack of training to  
21 work with patients with dementia. A benefit of the research process was that it had brought  
22 together optometry, ophthalmology and neurology. However, there was a lack of awareness  
23 throughout the different disciplines about PCA and this would need to be tackled in the  
24 future. The involvement of primary care, particularly GPs would also be vital to this.  
25  
26

27 *People aren't making the diagnosis always and they're getting misdiagnoses or the*  
28 *patient's being pigeon-holed in the wrong place.*  
29 *(76 merged coding)*  
30

### 31 **Future research implications**

32

33 Clinicians expressed particular interest in the implications of this project and its exploration  
34 of tests and the testing process. This was discussed during their one to one interviews, but  
35 particularly in the focus group. It was apparent that there were two broad areas for taking the  
36 research forwards. First, it was important to gain greater clarity about the numbers of  
37 patients with PCA within the broader spectrum of people with dementia. Second, there  
38 needed to be greater awareness of PCA by making use of development opportunities across  
39 the different professions, and data about the current level of understanding would provide a  
40 baseline against which to measure educational interventions.  
41  
42

43 Greater clarity about numbers could be achieved by re-analysing previous tests which have  
44 been used on a larger scale and included full and fragmented letters as part of the wider  
45 test. It may also be possible to add this element to new research as well. However,  
46 discussion emphasised that looking at numbers alone was not enough. If clinicians could not  
47 recognise PCA, they would not be able to diagnose it from the sometimes contradictory  
48 information they may come across from testing patients.  
49

50  
51 *The low hanging fruit as far as a simple research question goes is: what are the three or*  
52 *four things which if you've got two or more of them then you are really thinking, it's not just*  
53 *an eyesight thing it's a brain thing? A test like that could be done in 30 seconds.*  
54 *(62 merged coding)*  
55  
56  
57  
58  
59  
60

1  
2  
3 It was suggested that one way to establish a baseline of understanding of dementia and  
4 PCA in particular would be, 'to run some short surveys with medical students across  
5 optometry, ophthalmology and neurology to gain a clearer understanding of current levels of  
6 awareness' (95 merged coding). This would help to develop such baseline data across the  
7 relevant professions.  
8

9 Previous research (Bowen et al, 2016) has shown that there is a strong association between  
10 visual impairment and the likelihood of being in residential care. The prevalence of visual  
11 impairment from all causes was found to be more than 2.5 times greater in residential home  
12 settings, even allowing for age and severity of dementia. Improving people's visual  
13 functioning will help their quality of life and increase their chances of staying out of  
14 residential care.  
15

16  
17 *I'm always worried that we work in a specialist centre and we get people with particular*  
18 *diagnoses and we've got very little idea of how representative our sample is of the rest of*  
19 *the world.*

20 (103 merged coding)  
21

22 Further research into screening tests for PCA is vital, and was considered to be an important  
23 follow-up to this pilot research by all the clinicians. This would involve identifying a small  
24 group of tests, such as the full and fragmented letters test, and trying them on different  
25 groups of patients. However, a significant factor with any screening test could be the number  
26 of false positives, which it was suggested might lead to too many referrals to neurology.  
27 More elaborate research follow-up could include running tests with a group of patients with  
28 PCA, a group with typical, memory-led Alzheimer's disease and an appropriate control group  
29 (or groups). There may also be other outcomes from existing surveys and other research  
30 that has already been completed, which could be aggregated into a literature review.  
31

32 Existing research has shown that there is a stark difference in the mean onset age for PCA  
33 compared with Alzheimer's disease. A participant pointed out that for PCA this age is 59,  
34 while it is at least 20 years later for Alzheimer's disease (94 merged coding).  
35

### 36 **Limitations**

37  
38 Clinicians expressed some reservations about the fact that tests had only been tried on three  
39 patients. It may be important to look at a wider range of patients as this could highlight other  
40 issues that might not be apparent from this small sample. The neurologist thought that the  
41 project's test process could have benefitted from the use of a wider range of screening tests.  
42 It is possible that some of these would prove more effective than others. Also, one clinician  
43 thought that it had not yet been possible to test the limits of what the patients could manage  
44 within the requirements of the research setting (105 merged coding) and the resources for  
45 testing available, which had not been as extensive as in their usual clinical settings.  
46  
47

48 However, there was agreement among the clinicians that patients had done much better on  
49 the tests than might be expected, given their complex range of problems (59 merged  
50 coding). This is positive as it provides some further support for the finding that many people  
51 living with dementia could complete most of the key elements of a standard sight test  
52 (Bowen et al, 2016).  
53  
54  
55  
56  
57  
58  
59  
60

## Conclusions

A simple test which contrasted full and fragmented images or letters was agreed to be the test that provided clearest evidence of PCA, or symptoms of other cortical vision problems, as patients could identify the full image but not the fragmented one. More generally, the clinicians felt that simple, short tests were more effective than subjective tests. The benefit of support from partners within the examination environment itself was also clear.

A key priority for patients and their partners was that diagnostic systems were in place to enable early identification of PCA. This meant that a consistent approach was needed across optometry, ophthalmology and neurology, with effective and prompt communication and referrals between clinicians, to prevent excessive and unnecessary delay in diagnosis. These concerns were echoed by the clinical professionals who acknowledged the difficulty many would have in making a diagnosis.

The test process needs to be flexible enough to accommodate atypical patient responses, and needs to take account of these patients' fatigue in general, and also their frustration with not being able to do things that were once normal everyday skills.

Future research should clarify numbers with PCA, establish cross-profession knowledge and skills in this area, and work on further screening tests for PCA, and although limited in scope and execution, the project supports existing evidence that there are suitable eye examination tests that people with dementia can engage with and complete.

## Recommendations

The outcomes from this project suggested that there were a number of recommendations which could be taken forwards.

1. Refine and simplify optometric and ophthalmological tests to make them more effective for patients with PCA or dementia more widely, and undertake research to find out how these work in practice with larger and more varied cohorts of patients.
2. Include the full and fragmented letters test and related tests from the Blue Books of Neurology used by neurologists as part of the research outlined in point 1, and examine their effectiveness in the diagnosis of PCA to develop understanding of the differentiation between visual problems with optical / ocular causes and those with cortical causes.
3. Develop professional learning materials to raise awareness of PCA.
4. Develop concise resources for patients with dementia so they can make the most of their eye test.
5. Review previous research to identify what indications there are about the prevalence of PCA in the UK.

## Author contributions and acknowledgements:

Michael Bowen co-drafted the manuscript with Harry Zutshi and reviewed and approved the final draft for submission. Martin Cordiner re-drafted the manuscript and approved the final

1  
2  
3 draft for submission. Sebastian Crutch reviewed drafts of the manuscript and approved the  
4 final draft for submission. Tim Shakespeare reviewed drafts of the manuscript and approved  
5 the final draft for submission. Harry Zutshi undertook the interviews and led the Focus Group  
6 as part of the project, and co-drafted the manuscript.  
7

## 8 **Funding**

9  
10 University College London funded this study through supporting the staff that undertook the  
11 project, and providing the venue and the catering. The College of Optometrists funded this  
12 study through supporting the staff that undertook the project, and paying for the delivery of  
13 relevant equipment, the transcribing of recordings, the consultant's time in undertaking  
14 interviews and analysing the results, and the relevant expenses of the practitioner's.  
15

## 16 **References**

17  
18  
19 Glen FC, Baker H, Crabb DP. A qualitative investigation into patients' views on visual field  
20 testing for glaucoma monitoring. *BMJ Open* 2014;4:e003996. doi:10.1136/bmjopen-2013-  
21 003996  
22

23 Pope C, Ziebland S, Mays N. Qualitative research in health care:  
24 analysing qualitative data. *BMJ* 2000;320:114.  
25

26 Tong A, Sainsbury P, Craig J. Consolidated criteria for reporting qualitative research  
27 (COREQ): a 32-item checklist for interviews and focus groups. *Int J Qual Health Care*  
28 2007;19:349–57.  
29

30 Kitinger J. Qualitative research: introducing focus groups. *BMJ* 1995;311:299–302.  
31

32 Bowen M, Edgar DF, Hancock B, Haque S, Shah R, Buchanan S, *et al*. The Prevalence of  
33 Visual Impairment in People with Dementia (the ProVIDe study): a cross sectional study of  
34 60-89 year old people with dementia and qualitative exploration of individual, carer and  
35 professional perspectives. *Health Serv Deliv Res* 2016;4(21)  
36

37 Crutch SJ, Schott JM, Rabinovici GD, Murray M, Snowden JS, van der Flier WM, Dickerson  
38 BC, Vandenberghe R, Ahmed S, Bak TH, Boeve BF, Butler C, Cappa SF, Ceccaldi M, de  
39 Souza LC, Dubois B, Felician O, Galasko D, Graff-Radford J, Graff-Radford NR, Hof PR,  
40 Krolak-Salmon P, Lehmann M, Magnin E, Mendez MF, Nestor PJ, Onyike CU, Pelak VS,  
41 Pijnenburg Y, Primativo S, Rossor MN, Ryan NS, Scheltens P, Shakespeare TJ, Suárez  
42 González A, Tang-Wai DF, Yong KX, Carrillo M, Fox NC; Alzheimer's Association ISTAART  
43 Atypical Alzheimer's Disease and Associated Syndromes Professional Interest Area.  
44 Consensus classification of posterior cortical atrophy. *Alzheimer's & Dementia* 2017. pii:  
45 S1552-5260(17)30040-7. doi: 10.1016/j.jalz.2017.01.014.  
46

47 Crutch, S. J., Lehmann, M., Schott, J. M., Rabinovici, G. D., Rossor, M. N., & Fox, N. C.  
48 (2012). Posterior cortical atrophy. *The Lancet Neurology*, 11(2), 170–178.  
49

50  
51 Pelak, V. S., Smyth, S. F., Boyer, P. J., & Filley, C. M. (2011). Computerized visual field  
52 defects in posterior cortical atrophy. *Neurology*, 77(24), 2119–2122.  
53  
54  
55  
56  
57  
58  
59  
60

# BMJ Open

**A qualitative, exploratory pilot study, to investigate how people living with posterior cortical atrophy, their carers and clinicians experience tests used to assess vision.**

|                                 |                                                                                                                                                                                                                                                                                                          |
|---------------------------------|----------------------------------------------------------------------------------------------------------------------------------------------------------------------------------------------------------------------------------------------------------------------------------------------------------|
| Journal:                        | <i>BMJ Open</i>                                                                                                                                                                                                                                                                                          |
| Manuscript ID                   | bmjopen-2017-020905.R1                                                                                                                                                                                                                                                                                   |
| Article Type:                   | Research                                                                                                                                                                                                                                                                                                 |
| Date Submitted by the Author:   | 16-Aug-2018                                                                                                                                                                                                                                                                                              |
| Complete List of Authors:       | Bowen, Michael; The College of Optometrists, Research<br>Zutshi, Harry; College of Optometrists, Research<br>Cordiner, Martin; The College of Optometrists,<br>Crutch, Sebastian; University College London Institute of Neurology<br>Shakespeare, Tim; University College London Institute of Neurology |
| <b>Primary Subject Heading</b>: | Neurology                                                                                                                                                                                                                                                                                                |
| Secondary Subject Heading:      | Ophthalmology, Qualitative research, Geriatric medicine                                                                                                                                                                                                                                                  |
| Keywords:                       | MENTAL HEALTH, Neuro-ophthalmology < OPHTHALMOLOGY, PRIMARY CARE, Vision, Optometry                                                                                                                                                                                                                      |
|                                 |                                                                                                                                                                                                                                                                                                          |

SCHOLARONE™  
Manuscripts



1  
2  
3 **A qualitative, exploratory pilot study, to investigate how people living with posterior**  
4 **cortical atrophy, their carers and clinicians experience tests used to assess vision**  
5

6 **Authors:**

7 Michael Bowen<sup>1</sup>, Harry Zutshi<sup>1</sup>, Martin Cordiner<sup>1</sup>, Sebastian Crutch<sup>2</sup>, Tim Shakespeare<sup>2</sup>  
8

9 <sup>1</sup> The College of Optometrists, London, UK

10 <sup>2</sup> Dementia Research Centre, University College London, UK  
11

12 **Funding statement:**

13 This work was funded by the College of Optometrists and University College London. Tim  
14 Shakespeare was supported by an Alzheimer's Research UK Research Fellowship.  
15 Sebastian Crutch was supported by a grant from ESRC/NIHR (ES/L001810/1).  
16  
17

18 **Competing interests statement:**

19 None of the authors had any competing interests in relation to this work.  
20  
21

22 **Corresponding author:**

23 Martin Cordiner ([martin.cordiner@college-optometrists.org](mailto:martin.cordiner@college-optometrists.org))  
24  
25

26 **Data sharing statement:**

27 The unedited transcripts of the interviews are held by the College. They are not currently  
28 publicly available.  
29  
30  
31  
32  
33  
34  
35  
36  
37  
38  
39  
40  
41  
42  
43  
44  
45  
46  
47  
48  
49  
50  
51  
52  
53  
54  
55  
56  
57  
58  
59  
60

## Abstract

**Objectives:** To investigate the experiences and views of people living with posterior cortical atrophy (PCA), their family carers and health care professionals of vision assessment tests.

**Design:** a qualitative investigation using video recordings of vision assessments, semi-structured interviews, and audio recordings of a focus group. Interviews and focus group used broad, open questions around the topic to prompt and guide discussion. Video and audio recordings were transcribed, manually coded and analysed using framework analysis.

**Setting:** University College, London's Queen's Square neurology centre provided the venues for all stages of the research.

**Participants:** Participants living with PCA were 1 male and two females, aged 67, 68 and 78 years. Health professional participants were a neurologist (male), two ophthalmologists (male) and an optometrist (female).

**Primary and secondary outcomes:** (1) Experiences and attitudes of people living with PCA and health professionals to vision assessment tests (2) views of health professionals and people living with PCA of whether some tests are more effective at discriminating between cortical vision problems and vision problems related to optical or ocular causes.

**Results:** Patients were able to engage with and complete a number of tests. Their partners played a vital role in the process. Participants reported that simple, short tests were more effective than more subjective tests. Examples of tests that appeared to be more problematic for the patient participants were the Amsler Grid and visual field analysis.

**Conclusions:** Although limited in scope and execution, the project suggests that some vision assessment tests are likely to support health professionals to discriminate between cortical and optical / ocular causes of visual impairment. It supports existing evidence that there are vision assessments that people with dementia can engage with and complete. We identify areas of importance for future research and make tentative suggestions for clinical practice.

### Strengths and limitations of this exploratory pilot study

- Small sample of patients took part in the study.
- Potential variation in the relative progression of PCA between the participants may have been a confounding factor
- Undertaken outside of usual clinical settings (due to multidiscipline approach), so patients might have performed differently in each discipline's normal clinical environment.
- Views on the experiences of both patients and practitioners in relation to each consultation captured separately, verbatim, and on the day the consultations were undertaken.
- Multidisciplinary approach, incorporating optometric, ophthalmological and neurological screening tests.

## Introduction

Posterior cortical atrophy (PCA) involves progressive visual dysfunction and a degeneration of the posterior brain's outer layer (the cortex). It is most commonly caused by Alzheimer's disease, although may also be caused by dementia with Lewy bodies, corticobasal degeneration or Creutzfeldt–Jakob disease [1]. The visual dysfunction experienced can encompass aspects of visuospatial and visuoperceptual processing. Features of Balint's syndrome (e.g. simultanagnosia, oculomotor apraxia) and of Gerstmann's syndrome (including acalculia and agraphia) are common [2, 3, and 4].

First described in 1988, consensus criteria for PCA have only recently been agreed [5] and diagnosis is often delayed or absent. The fact that it often goes unrecognised means that a prevalence figure is hard to estimate (some studies have suggested about 5% of those diagnosed with early onset Alzheimer's disease may have PCA, [6]). Most Alzheimer's disease cases appear in people over 65, but PCA tends to occur between 50 and 65 [7 and 8].

People living with PCA often present to optometrists and ophthalmologists with non-specific visual problems, but unless the clinician specifically looks for the signs and symptoms of PCA, it may not be picked up. It is not uncommon for people living with PCA to report delays from first presentation with visual symptoms to final diagnosis of PCA of many years. Investigating how vision assessment is experienced by people living with PCA, and the health professionals' perspectives of conducting such assessments may offer insights into how to improve the process, and could provide scope for identifying tests that may be particularly useful in supporting clinicians to distinguish between visual symptoms with optical / ocular causes and those with cortical origins.

Individuals with PCA offer a unique perspective on the visual difficulties which may be experienced by many individuals with typical Alzheimer's, at a point when the memory, language and insight problems of the latter group limit their ability to communicate what they are experiencing. Also, the nature of cortical visual problems in PCA can confound the use of standard optometric assessments. For example, the majority of PCA patients have normal or near-normal visual acuity, yet may struggle with a standard Snellen letter chart because of a reduced effective field of vision, and so can find it easier to read smaller, rather than larger, fonts. They may also struggle with excessive visual crowding in their central vision, resulting in difficulty reading letters surrounded by other letters or clutter [9], another common trait of optometric testing charts.

### **Purpose:**

The complexities of both diagnosing PCA [10 and 5] and the reality that - given the complexities introduced by the cortical visual perceptual symptoms associated with PCA - it may be complicated for optometrists and ophthalmologists to work with people living with PCA to find the most appropriate approach to correcting visual impairment, to produce the best possible visual experience, presented an opportunity for productive collaboration across the disciplines of optometry, ophthalmology, neurology and neuropsychology, to investigate the following research questions:

- How do people living with posterior cortical atrophy (PCA) experience various tests used to assess vision? What are the experiences of health professionals of administering these tests when examining people living with PCA?

- Are there particular tests for assessing vision that are more effective at discriminating between cortical vision problems and vision problems related to optical or ocular causes?

Qualitative methodologies, such as semi-structured interviews, focus groups [11], and content analysis (or video / audio transcripts for example) offer an effective way to collect information about what patients think, how they think, or why they may hold a particular view. Interactions between participants in groups can encourage participants to explore and clarify individual and shared perspectives and may support participation by people who may be reluctant to contribute their views in a more formal one-to-one scenario [12]

There is limited qualitative evidence from people living with PCA, or the health professions involved in assessing vision for individuals in this group about the experiences of having vision assessed, or assessing vision. In particular, there is little patient and clinician data about the experience of administering or being assessed using various standard tests. Focus groups have been used in a small number of studies to examine the general experiences of people living with conditions such as glaucoma, which require regular vision assessments [13, 14].

However, there is limited evidence relating to the opinions of patients living with PCA, or clinicians, about the tests used to assess vision. Anecdotal evidence suggests that patients dislike performing the VF test, but no study has interviewed patients with living with PCA in detail about their perceptions of the tests used by various health professionals to assess vision and visual perception. Such evidence could begin to shed light on how tests are experienced, and whether some tests may prove both more acceptable / accessible, and better able to support professionals in discriminating between cortical and optical / ocular causes of visual problems.

This project was structured as an initial exploration of the qualitative experiences of people living with PCA and health professionals. The project was designed to gather rich qualitative data, although the limited sample size reduced the scope for definitive conclusions in relation to these questions to be reached. The intention was to explore the potential for gathering and analysing this type of data, with this participant group, with a view to informing the development of subsequent research. In addition to investigating the viability of such research, the project was intended to provide some insights into potential target tests and vision assessment methods of particular interest, to enhance and inform clinical practice and increase awareness of dementia-related cortical visual impairment through improved training and access to resources. It was also anticipated that it might enable further research to be more focused.

## Methods

### Participants

Vision assessments and post-assessment interviews took place over the course of a day at University College London's (UCL) Dementia Research Centre at Queen Square in London, in February 2016. This location was selected as it was familiar and accessible to participants living with PCA, convenient to the clinicians participating, and had the scope to support the relevant equipment and filming required. A focus group was then held for the health professionals involved (as well as one other ophthalmologist invitee) in March 2016, to analyse footage selected from the vision assessments (footage was selected by HZ and MB

1  
2  
3 initially, and reviewed by SC and TS before inclusion) and discuss a schedule of questions  
4 developed by the study team.  
5

6 The study used purposeful sampling, whereby suitable participants living with PCA were  
7 selected by the UCL team from the Rare Dementia Support PCA support group membership  
8 [15] ([www.raredementiasupport.org](http://www.raredementiasupport.org)), based on their ability and willingness to attend and on  
9 the need to have participants with a range of PCA presentations. Participants with PCA had  
10 a diagnosis consistent with the core clinico-radiological syndrome [10]. Although all  
11 individuals presented with progressive decline in visual processing and relatively intact  
12 memory in the early stages, some impairments of episodic memory were apparent at the  
13 time of this study.  
14

15 At present in the UK many people living with early PCA are first referred into secondary care  
16 services by optometrists working in community settings. These referrals are frequently not  
17 identified as suspected PCA and due to the lack of any current referral pathways from  
18 primary care optometry to secondary care neurology services, the referral route is nearly  
19 always to the optometry or ophthalmology functions of hospital eye services. For these  
20 reasons the project aimed to include vision testing techniques from several different health  
21 care disciplines, to gain insights into possible differences at the various access and referral  
22 points. This meant that the logistics of the testing and interview schedule (in particular the  
23 time taken to complete each stage) restricted the number of participants to three people with  
24 PCA (one male, two female, ages 67, 68 and 78).  
25  
26

27 Participants with PCA were given an information sheet with brief details of the purpose and  
28 programme of the day - to gather data about the experience of having vision and eye health  
29 assessed by a range of clinicians. A member of the research team provided the information  
30 verbally to participants with reading difficulties and checked with each participant that they  
31 had understood the information provided and answered any questions that the participant or  
32 their family member had. Written consent to participate in the research was received, along  
33 with written consent relating to the video recording of the examination sessions and  
34 interviews. Participants were informed in writing and reminded verbally on the day that they  
35 could withdraw from the project at any time. Each participant with PCA was accompanied by  
36 a family member throughout the processes of the day.  
37  
38

39 Three clinicians took part on the vision assessment day - an optometrist, a neurologist and  
40 an ophthalmologist (one female and two male), and they were given briefing information  
41 about the testing they would be asked to carry out and the post-testing interviews. Consent  
42 for participation and video recording of the assessments and audio recording of the focus  
43 group was received from each of the professional participants. The professional participants  
44 had varying experience of assessing vision in people with dementia or PCA. The optometrist  
45 had more than 20 years of experience in primary and secondary care settings, and had  
46 encountered numerous people living with dementia and some people living with PCA. The  
47 neurologist was an experienced consultant neurologist with more than 20 years of clinical  
48 and research experience working with numerous people living with PCA. The  
49 ophthalmologist was more recently qualified, and had encountered few people living with  
50 PCA.  
51  
52

53 The study conformed to the Declaration of Helsinki, and written consent to participate and for  
54 video recording and audio recording was obtained for all participants, prior to the  
55 examinations / interviews and focus groups. The study was approved by the Queen Square  
56 Research Ethics Committee.  
57  
58

## Procedure

Each patient participant completed three sequential vision assessments with an optometrist, ophthalmologist and neurologist, with their partner in attendance. After each assessment, the patient participant and their partner completed a brief interview, as did each clinician.

In advance of the testing day, semi-structured interview schedules were developed for the post-examination interviews with the clinicians and people with PCA. Following the day of vision assessments, HZ and MB prepared a schedule of questions / topics for the clinicians' focus group (which took place two weeks after the vision assessment day to allow time for video footage to be reviewed and selections made for presentation to the focus group), informed by the themes arising during the eye examinations and post-examination interviews.

## Vision assessment protocol

Each of the three health professionals was asked to assess the vision of each of the three participants in a manner that followed as closely as possible the methods they would use in their usual clinical practice. Professional participants were asked to approach the assessments as closely as possible to their usual practice.

These broad test protocols equated to: optometrist - primary care General Ophthalmic Services sight test [16]; ophthalmologist - general secondary care hospital eye service general referral (refraction clinic) vision assessment; neurologist - the visual perceptual elements of a routine neurological examination.

Each clinician was provided with as much of the equipment for assessing vision that they would usually have available.

Equipment available was as follows:

- Hand held slit-lamp (Keeler)
- Tonometer - CT-80 (table mounted)
- Field screener - Henson 9000
- Ophthalmoscope
- Retinoscope
- Indirect ophthalmoscope (Keeler)
- Prism bar
- Cross-cyl test lenses
- Trial frame
- Trial frame lens set
- Focimeter (Pentax)
- Volk lens
- 20D lens

Tests / Charts:

- Standard Snellen Chart
- Thompson Software Electronic test chart software (running on an Apple iPad) - including cross-cyl and near reading
- Near reading test chart - cards
- Ishihara colour vision test cards

1  
2  
3 Frisby stereo test chart  
4 Cardiff cards or Teller visual acuity cards  
5

6 The Queen Square Screening Test for Visual Deficits (The Blue Book).[17]  
7 The Queen Square Screening Test for Cognitive Deficits (The Green Book).[17]  
8

9 As the primary objective of the study was not to investigate a specific vision assessment  
10 procedure, or test sequence, the health professionals were not given a specific sequence for  
11 test elements. They were asked to take the approach to vision assessment / sight testing  
12 that they would usually follow in their practice setting.  
13

14 These were the agreed key assessments that the health professionals suggested would  
15 generally be included in their usual assessments:  
16

17 Neurologist's assessment:

- 18 - medical history
- 19 - general examination
- 20 - eye signs (visual fields on confrontation, eye movements)
- 21 - limb signs  
22

23 Ophthalmologist's / Optometrist's assessment:

- 24 - medical history
- 25 - ophthalmoscopy.
- 26 - retinoscopy
- 27 - slit-lamp examination
- 28 - subjective and objective refraction
- 29 - convergence
- 30 - ocular motility
- 31 - pupil reflexes
- 32 - intraocular pressure (tonometry)
- 33 - visual fields
- 34 - accommodation  
35

36 The order of optometry, ophthalmology and neurology assessments was varied between  
37 participants in an ABC BCA CAB design, with each assessment followed by an interview.  
38

### 39 **Interview and focus group procedures**

40  
41  
42 The interview and focus group schedules were developed following initial discussions within  
43 the study team. The topics identified and included within the schedules served only as a  
44 guide for the interviews and focus group. The order in which topics were addressed in  
45 interviews was not rigidly applied and question wording was not prescribed in advance.  
46 Where considered helpful, prompts were used by the interviewer / focus group facilitator to  
47 introduce topics and to encourage participants to expand on their comments. However, the  
48 core of the discussion came from the participants and care was taken to use open questions  
49 and to avoid unduly leading the conversations.  
50

51 Although the patient participants were aware that they were going to have their eyes  
52 examined and vision assessed by the clinicians, they were not made explicitly aware of the  
53 focus of the study being to identify how tests were experienced and whether any tests were  
54 particularly good or bad when being used with someone with PCA. All interviews, and the  
55 facilitation of the clinicians' focus group, were conducted by one of the investigators (HZ).  
56  
57

1  
2  
3 The professionals' focus group was co-facilitated by MB. The interviewer and participants  
4 had not met each other prior to the testing day, so introductions were made prior to the first  
5 interviews. In addition to the video recordings, the interviewer took field notes during the  
6 interviews. This note taking was intentionally kept to a minimum to enable the interviewer to  
7 attend as fully as possible to the interviews. During the focus group other members of the  
8 investigation team took notes to free the facilitator to focus on the discussion.

9 Each post-examination interview lasted around 5 minutes - these interviews were  
10 intentionally kept brief to manage the time / energy demands of a long day of testing for the  
11 participants. Each filmed examination session lasted approximately 20-30 minutes. The  
12 clinicians' focus group lasted for about three and a half hours, with a 15-minute break in the  
13 middle.  
14

15 Consolidated Criteria for Reporting Qualitative Research (COREQ) guidelines were followed  
16 in the design and reporting of the study [18]. A SRQR (Systematic Reporting of Qualitative  
17 Research) checklist was completed to ensure that the final paper complied with these  
18 guidelines [19].  
19  
20

21 Patient and public involvement:  
22

23  
24 **How was the development of the research question and outcome measures informed  
25 by patients' priorities, experience, and preferences?**

26 The research question was developed following patient and public data collected during the  
27 ProVIDe study (708 participants) [20], and also from discussions with members of the UCL  
28 PCA Support Group at one of their regular meetings (60 attendees).  
29

30 **How did you involve patients in the design of this study?**

31 Potential participants (members of the UCL PCA Support Group) were asked about the  
32 feasibility of the design, and any specific concerns and interests prior to the final design  
33 being confirmed.  
34

35 **Were patients involved in the recruitment to and conduct of the study?**

36  
37 Patients were not directly involved in the collection or analysis of data in this project, nor in  
38 the process of recruiting participants.  
39

40 **How will the results be disseminated to study participants?**

41 All those who participated were informed of the outcomes of the vision assessments where  
42 these indicated the need for further investigation / referral. Participants will receive a copy of  
43 the final report and any publications, and these will also be shared with the wider  
44 membership of the PCA Support Group and other relevant patient networks. Notice of  
45 papers will be given in the Alzheimer's Society patient publication.  
46

47 **For randomised controlled trials, was the burden of the intervention assessed by  
48 patients themselves?**

49 Not applicable.  
50

51 **Patient advisers should also be thanked in the contributorship  
52 statement/acknowledgements.**

53 Please see acknowledgements  
54

55 **Analysis**  
56  
57  
58  
59  
60



All vision tests / eye examinations and post-examination interviews were video recorded. The clinician focus group was audio recorded. The dialogue from the video and audio recordings was transcribed and reviewed by the investigators. In a small number of instances certain words were inaudible on the recordings, so field notes were used to account for any unclear information in those sections. All transcripts were pseudonomised.

The project followed an approach that was broadly constructivist and founded in the concepts of grounded theory. Data were analysed by two of the authors (MB and HZ) independently using framework analysis [21, 22] as shown in **Table 1**. An inductive approach was taken to coding and analysis. Each investigator read and re-read the transcripts and manually identified the key themes from the data. Once the investigators had both completed their independent theme identification, they met to review respective themes and organise the thematic framework, condensing and refining the categories that had been identified and identifying additional themes for exploration. Any differences of opinion regarding the relative importance of themes, or the meanings of sentences were discussed until a consensus was reached.

**Table 1: Framework technique used for data analysis.**

|                                          |                                                                                                                                                                     |
|------------------------------------------|---------------------------------------------------------------------------------------------------------------------------------------------------------------------|
| <b>1. Familiarisation</b>                | Manuscripts are read and re-read independently by investigators.                                                                                                    |
| <b>2. Identifying thematic framework</b> | Themes are identified and then reviewed jointly and a refined / condensed set of themes agreed on.                                                                  |
| <b>3. Coding / Indexing</b>              | Codes are applied to the data systematically by both investigators independently. Coding is then reviewed and discussed until final consensus on coding is reached. |
| <b>4. Charting</b>                       | Data is rearranged in line with thematic content in a manner that supports cross-case and within-case analysis.                                                     |
| <b>5. Mapping and interpretation</b>     | Data is interpreted and conclusions and recommendations drawn.                                                                                                      |

## Findings

Initial coding was completed according to the themes identified and agreed following stages 1 and 2 of the framework in Table 1 . During coding additional themes were identified. There were also occasions where it became clear during the coding process that themes initially considered distinct were actually either a single theme or a theme and very closely linked sub-theme. Themes and sub-themes are summarised in **Figure 1**.

## Figure 1: Themes and sub-themes identified.

## Results

All of the participants were able to complete the full sequence of vision assessments with each of the participating professionals. However, within each assessment there was variation regarding the participants' ability to complete individual tests. Although 45 minutes

1  
2  
3 was allowed in the schedule, with the exception of the neurologist, the professional  
4 participants found it difficult to complete the tests within the time, or found that the patient  
5 participants were finding the testing tiring.  
6

### 7 **The test experience**

8  
9 Clinicians reported that it was difficult to take a reliable history because of patient memory  
10 problems. They found that the simple, short tests appeared to work the best. Tests that  
11 included too many variables appeared to be less readily administered and were agreed to be  
12 likely to be less effective with these 3 patients. Examples of tests that appeared to be more  
13 problematic for the patient participants were the Amsler Grid [23] and visual field analysis.  
14 Other optometric, ophthalmic and neurological tests were generally reported by the clinicians  
15 as appearing to be more effective; however, more subjective tests such as colour vision,  
16 depth perception and visual acuity were reported by patient participants as being, or seemed  
17 to clinician participants to be more difficult for the patient participants. This was reported as  
18 apparently being due to either difficulty in understanding and / or retaining the instructions or  
19 visuoperceptual problems in completing the test, or some combination of these. A  
20 neuropsychological test using full and fragmented letters or images (see Figure 2) appeared  
21 to offer potential as a screening test to discriminate between optical / ocular vision problems  
22 and cortical visual deficits. This type of test had the benefit of being short and simple. The  
23 professional participants agreed that this would be a good target for further research.  
24  
25

### 26 **Figure 2: An example of a fragmented letter, in this case the letter 'A'.**

27  
28  
29  
30 Clinicians noted that patients were affected by their involvement in one test after another.  
31 Fatigue was definitely a factor by the end of the day and within the test process. Patients  
32 would become more distracted, for example when their second eye was being tested. This  
33 meant that the time that testing took was significant. Too long and the patient may become  
34 too tired to continue without a break. Also, the testing process was particularly challenging  
35 for patients as it explored skills that they were once proficient in such as reading, but now  
36 find a struggle. Testing provided constant reminders of this.  
37  
38

39  
40 *'All three patients attempted reading. This is challenging for the patients as it is an aspect*  
41 *of real life they are concerned about anyway. I also checked to see if using your finger as*  
42 *a guide helped with reading but it did not.'*  
43 (Clinician interview 12.2)

44 Patients gave two reasons why they had volunteered to be involved in the testing day. First,  
45 it was a chance to contribute to research into a greater understanding of PCA, as patients  
46 had had difficulties in gaining an accurate diagnosis of their condition in the first place.  
47 Second, it was a chance to find out more up-to-date information about how their disease was  
48 progressing and to check their vision.  
49

50 Patients recognised that vision assessments were generally necessary. Although they all  
51 remained positive about the process of repeated vision assessments on the day, and were  
52 made aware of the fact that they could stop at any point during the day they also found it  
53 uncomfortable and emotional at times, as it focused on what they were not able to do. As  
54 well as reporting tiredness, it could be experienced as physically unpleasant as well. Patient  
55 responses varied greatly across the tests. Some they found easy to do, some were difficult,  
56  
57

1  
2  
3 while one or two they could not do at all. All patients reported positively on the clarity of  
4 explanation of the test elements by each clinician. They welcomed the fact that key  
5 information was repeated at intervals. These reminders of the key project information  
6 included research team members checking that participants were happy to continue and  
7 ensuring that they were aware that they could take additional breaks between the sessions if  
8 they wished to. Tea / coffee and juice / water were available to participants on request, and  
9 were regularly offered.  
10

11 *It is as if I have been smacked in the face ... that sort of feeling that you get when you*  
12 *have blown your nose too hard or been hit in the nose. So that is a physical feeling. It's*  
13 *almost like little hooks being pulled around the eye, it's quite hard work. (Patient interview*  
14 *3.4)*  
15

16 Patients' partners played a vital role in the testing process. This role went beyond  
17 encouragement and support. It was about helping and prompting patients where they had  
18 memory lapses. They had shared patient frustrations when it had been difficult for clinicians  
19 despite many tests to diagnose PCA in the first place. Patients could turn to their partners for  
20 assurance during the tests, which could be given simply as a nod of encouragement or the  
21 prompt of a correct word.  
22  
23

24 *The real crux of it is to recognise the move from eyes to brain. I am not sure still from the*  
25 *sort of ophthalmic tests we had, which are fairly standard eye tests that even a competent*  
26 *ophthalmologist would pick up necessarily that it is a brain disorder, that it is to do with*  
27 *processing the information.*  
28 *(Partner comment in patient interview 6.8)*  
29

### 30 **Identifying cortical perceptual problems**

31

32 The clinicians reviewed their experience of working with patients with PCA. They argued that  
33 it is important to look at two different aspects of care, pre-diagnosis and post-diagnosis. Pre-  
34 diagnosis there were real concerns about a wide range of clinicians who could potentially be  
35 involved, but who may find it difficult to identify suspect-PCA or to discriminate between  
36 optical / ocular vision problems and cortical perceptual issues. They could include  
37 optometrists, ophthalmologists, neurologists as well as GPs. If it was possible to develop a  
38 simple test or series of tests to give an indication that a visual perceptual deficit or condition  
39 such as PCA may be involved, then this would be a significant step forwards and avoid a  
40 situation where patients visit a number of clinicians without anyone coming up with a firm  
41 diagnosis. This would also have potential for primary care settings as well. One clinician also  
42 thought it would be useful to involve orthoptists.  
43  
44

45 *They come in saying I've got a problem with my eyes, I can't see things and we do our*  
46 *examination and say, actually no, we can't really find any deficit at all, back you go to your*  
47 *GP and really the diagnosis would potentially be missed.*  
48 *(21 merged coding)*  
49

50 *Post diagnosis it is still very important that the patient is able to access primary eye care*  
51 *so that they get monitoring of their general eye health and accurate correction of vision*  
52 *defects.*  
53

54 *(76 merged coding)*  
55  
56  
57  
58  
59  
60

1  
2  
3 For patients, trying to get an accurate diagnosis was critical. For one patient this took six  
4 years. Patients thought that they fell between different clinical disciplines, going from one to  
5 another with no definitive diagnosis. Patients often reported a number of common  
6 symptoms. These included not being able to read dot matrix signs in the underground or on  
7 buses, dislike of shiny surfaces and down escalators. A particular frustration was the ability  
8 to read, which might come and go in some patients, or be fully lost for others. One patient  
9 commented on how not being able to drive any longer had badly affected her.  
10

11 *I was constantly being bumped from pillar to post either at the hospital ophthalmic*  
12 *department or another trying to work out why I couldn't read properly and everything was*  
13 *falling off...things would slide off the page, I would say like icing off a cake.*  
14 (Patient interview 3.9)  
15

16 Patients' partners also stressed the difficulty of gaining the PCA diagnosis, but recognised  
17 that it is a rare disease that is hard to identify. This was made worse by falling between  
18 different specialisms.  
19

20  
21 As a result of this, a key priority for patients and their partners was that appropriate systems  
22 were in place to enable early identification of PCA by primary and secondary care  
23 professionals. This meant that a consistent approach was needed across optometry,  
24 ophthalmology and neurology, with clear, effective and prompt communication and referrals  
25 between clinicians. Partners and patients were vocal in their commitment to research  
26 projects such as this one and its importance in highlighting changes that could improve the  
27 patient experience, while also recognising that PCA was not straightforward and that it could  
28 be very difficult to diagnose.  
29

30 Once they had a diagnosis, it was vital that any eyesight problems were identified promptly  
31 and treated appropriately.  
32

33  
34 *I think probably what happens is you're falling between two disciplines; you're sort of*  
35 *being looked at by the neurologist and the ophthalmologist and they're not sort of linking...*  
36 *there almost needs to be a separate person in between who understands the neurology*  
37 *and the eye actions.*  
38 (Partner comment in patient interview 4.10)  
39

### 40 **Learning from the tests**

41  
42 Clinicians reviewed the learning from the project testing through detailed discussions in the  
43 focus group. There were a number of issues which emerged from this. Using a chart with  
44 lines of letters was far less effective than presenting patients with images of single letters.  
45 Multiple lines often caused patients to mix up letters on different lines. A simple test which  
46 contrasted full and fragmented images or letters was agreed to be the test that provided  
47 clearest evidence of PCA, or symptoms of other cortical vision problems, as patients could  
48 identify the full image but not the fragmented one. This worked with a letter or another object  
49 as the image. Another test was found to be to use photographs of common objects, but from  
50 unusual angles. Patients also experienced other symptoms, which while not necessarily  
51 unusual for people living with PCA or other cortical visual problems, would be relatively  
52 uncommon in most primary care eye health settings.  
53  
54  
55  
56  
57  
58  
59  
60

1  
2  
3 For example, one said she could identify a small crumb on the floor but yet not see a glass  
4 on the table. One neurological test looked at visual disorientation. The patient was asked to  
5 grasp the clinician's finger, but was often unable to do so. It is not uncommon for visual field  
6 defects to be confused with problems and disorders of spatial cognition (such as  
7 simultanagnosia) [24], which may lead to eye health professionals missing a cortical problem  
8 such as PCA. For example, people with simultanagnosia may have serious problems  
9 performing perimetric tests (and thus appear to have limited visual fields), while their visual  
10 field may be intact in terms of their optical system and ocular health [25].  
11

12 *I ask patients to grab my finger. This can look like a field defect, but it is not. Patients can*  
13 *see the hand and can copy the hand movement, yet cannot locate the finger in space.*  
14 *There is an unusual visual field and visual disorientation.*  
15 (Clinician interview 12.4)  
16

17  
18 One clinician noted that it would be useful to include a routine slit lamp investigation with the  
19 tests in order to help determine the presence / absence of retinal pathology. Patient  
20 participants did however report that the slit lamp examination was one of the most  
21 unpleasant parts of the optometric assessment. Another thought that it might be worth trying  
22 other field test approaches such as confrontation fields or some of the more recent tablet-  
23 based field tests. Patients experienced particular problems with the visual field analysis. One  
24 patient could not see the light at all, while it 'came and went' for another patient. It is possible  
25 that this was due to optic ataxia, which is not uncommon among people living with PCA, but  
26 in primary eye health practice or general ophthalmology clinics this might not be readily seen  
27 as the most obvious explanation for such an observation [26].  
28

29 *Can you see the light?" and I had to say no, I couldn't. He said, "Can you tell me where*  
30 *the light is?" and I said, "What light?"*  
31 (Patient interview 4.5)  
32

33  
34 Patients and partners noted that there could be a cumulative effect of testing which involved  
35 things that they could not do, or skills they had lost. This increased fatigue and made  
36 concentration harder. Sometimes a break was needed.  
37

38  
39 Patients demonstrate awareness that their own memories could be erratic and unreliable.  
40 They were also aware that they could have good and bad days. These factors seemed to be  
41 driving the patient and carer view that test process needed to be flexible enough to  
42 accommodate these different patient responses and needed to take account of their fatigue  
43 and frustration with not being able to do things that were once normal everyday skills.  
44

45  
46 Two of the clinicians indicated that they had greater confidence in running tests for people  
47 with PCA after the testing with the three patients. They both had experience of previous  
48 patients where it was harder to carry out testing. The clinicians were interested to discuss  
49 how what they had learnt from the research could be put into practice within their own work  
50 settings. Making changes such as splitting testing into two parts could help to alleviate some  
51 of the fatigue and distraction. This would not just apply to PCA patients, but also those with  
52 other forms of dementia.

53  
54 The optometrist raised the issue of the length of the average sight test during a standard  
55 day's practice. The traditional 20-minute test was clearly insufficient for what was involved.  
56 She found a good pattern was to alternate 30 minute and 45 minute tests, allowing scope for  
57 patients with more complex needs (56/57 merged coding).  
58

1  
2  
3  
4 Discussions between clinicians reflected patient concerns about the time that it took to get a  
5 correct diagnosis of PCA. Some issues reflected wider problems about the lack of training to  
6 work with patients with dementia. A benefit of the research process was that it had brought  
7 together optometry, ophthalmology and neurology. However, there was a lack of awareness  
8 throughout the different disciplines about PCA and this would need to be tackled in the  
9 future. The involvement of primary care, particularly GPs would also be vital to this.  
10

11 *People aren't making the diagnosis always and they're getting misdiagnoses or the*  
12 *patient's being pigeon-holed in the wrong place.*  
13 (76 merged coding)  
14

### 15 **Future research implications**

16  
17 Clinicians expressed particular interest in the implications of this project and its exploration  
18 of tests and the testing process. This was discussed during their one to one interviews, but  
19 particularly in the focus group. It was apparent that there were two broad areas for taking the  
20 research forwards. First, it was important to gain greater clarity about the numbers of  
21 patients with PCA within the broader spectrum of people with dementia. Second, there  
22 needed to be greater awareness of PCA by making use of development opportunities across  
23 the different professions, and data about the current level of understanding would provide a  
24 baseline against which to measure educational interventions.  
25  
26

27 Greater clarity about numbers could be achieved by re-analysing previous tests which have  
28 been used on a larger scale and included full and fragmented letters as part of the wider  
29 test. It may also be possible to add this element to new research as well. However,  
30 discussion emphasised that looking at numbers alone was not enough. If clinicians could not  
31 recognise PCA, they would not be able to diagnose it from the sometimes contradictory  
32 information they may come across from testing patients.  
33  
34

35 *The low hanging fruit as far as a simple research question goes is: what are the three or*  
36 *four things which if you've got two or more of them then you are really thinking, it's not just*  
37 *an eyesight thing it's a brain thing? A test like that could be done in 30 seconds.*  
38 (62 merged coding)  
39

40 It was suggested that one way to establish a baseline of understanding of dementia and  
41 PCA in particular would be, 'to run some short surveys with medical students across  
42 optometry, ophthalmology and neurology to gain a clearer understanding of current levels of  
43 awareness' (95 merged coding). This would help to develop such baseline data across the  
44 relevant professions.  
45

46 Previous research (Bowen et al, 2016) has shown that there is a strong association between  
47 visual impairment and the likelihood of being in residential care. The prevalence of visual  
48 impairment from all causes was found to be more than 2.5 times greater in residential home  
49 settings, even allowing for age and severity of dementia. Improving people's visual  
50 functioning will help their quality of life and increase their chances of staying out of  
51 residential care.  
52  
53

54 *I'm always worried that we work in a specialist centre and we get people with particular*  
55 *diagnoses and we've got very little idea of how representative our sample is of the rest of*  
56 *the world.*  
57

(103 merged coding)

Further research into screening tests for PCA is vital, and was considered to be an important follow-up to this pilot research by all the clinicians. This would involve identifying a small group of tests, such as the full and fragmented letters test, and trying them on different groups of patients. However, a significant factor with any screening test could be the number of false positives, which it was suggested might lead to too many referrals to neurology. More elaborate research follow-up could include running tests with a group of patients with PCA, a group with typical, memory-led Alzheimer's disease and an appropriate control group (or groups). There may also be other outcomes from existing surveys and other research that has already been completed, which could be aggregated into a literature review.

Existing research has shown that there is a stark difference in the mean onset age for PCA compared with Alzheimer's disease. A participant pointed out that for PCA this age is 59, while it is at least 20 years later for Alzheimer's disease (94 merged coding).

### Limitations

Clinicians expressed some reservations about the fact that tests had only been tried on three patients. It may be important to look at a wider range of patients as this could highlight other issues that might not be apparent from this small sample. Given the relatively early average age of onset of PCA, the ages of the participants in this explorative study means that additional data from people living with earlier PCA would be important to gather in subsequent research.

The neurologist thought that the project's test process could have benefitted from the use of a wider range of screening tests. It is possible that some of these would prove more effective than others. Also, one clinician thought that it had not yet been possible to test the limits of what the patients could manage within the requirements of the research setting (105 merged coding) and the resources for testing available, which had not been as extensive as in their usual clinical settings.

However, there was agreement among the clinicians that patients had done much better on the tests than might be expected, given their complex range of problems (59 merged coding). This is positive as it provides some further support for the finding that many people living with dementia could complete most of the key elements of a standard sight test (Bowen et al, 2016).

### Conclusions

A simple test which contrasted full and fragmented images or letters was agreed to be the test that provided clearest evidence of PCA, or symptoms of other cortical vision problems, as patients could identify the full image but not the fragmented one. More generally, the clinicians felt that simpler, shorter objective tests appeared to be generally more accessible to the patient participants than more complex, longer or more subjective ones. The benefit of support from partners within the examination environment itself was also clear.

A key priority for patients and their partners was that systems were in place to facilitate early identification of cortical perceptual problems and to have these referred into the appropriate secondary care service to enable a clear diagnosis of PCA (or other neurological condition

causing the problem) to be confirmed. This meant that a consistent approach was needed across optometry, ophthalmology and neurology, with effective and prompt communication and referrals between clinicians, to prevent excessive and unnecessary delay in diagnosis. These concerns were echoed by the clinical professionals who acknowledged the difficulty many health professionals, would currently be likely to have in making clear discriminations between optical / ocular and cortical vision problems.

The test process needs to be flexible enough to accommodate atypical patient responses, and needs to take account of these patients' fatigue in general, and also their frustration with not being able to do things that were once normal everyday skills.

The professional participants in this explorative research project strongly agreed that future research should clarify numbers with PCA, establish cross-profession knowledge and skills in this area, and work on further screening tests for PCA, and although limited in scope and execution, the project supports existing evidence that there are suitable eye examination tests that people with dementia can engage with and complete.

## Recommendations

The outcomes from this project suggested that there were a number of recommendations which could be taken forwards.

1. Refine and simplify optometric and ophthalmological tests to make them more effective for patients with PCA or dementia more widely, and undertake research to find out how these work in practice with larger and more varied cohorts of patients.
2. Include the full and fragmented letters test and related tests from the Queen Square Screening Test for Visual Deficits [17] used by neurologists as part of the research outlined in point 1, and examine their effectiveness in differentiating between optical / ocular and cortical vision problems (caused by conditions such as PCA) in order to develop understanding of their potential to aid clinicians in primary and secondary care settings to discriminate between visual problems with optical / ocular causes and those with cortical causes.
3. Develop professional learning materials to raise awareness of PCA.
4. Develop concise resources for patients with dementia so they can make the most of their eye test.
5. Review previous research to identify what indications there are about the prevalence of PCA in the UK.

## Author contributions:

All of the co-authors were involved from the outset in the design and development of the project and the research protocol. Michael Bowen co-drafted the manuscript with Harry Zutshi and reviewed and approved the final draft for submission. Martin Cordiner re-drafted the manuscript and approved the final draft for submission. Sebastian Crutch reviewed drafts of the manuscript and approved the final draft for submission. Timothy Shakespeare reviewed drafts of the manuscript and approved the final draft for submission. Harry Zutshi



1  
2  
3 undertook the interviews and led the Focus Group as part of the project, co-drafted the  
4 manuscript and reviewed and approved the final draft for submission.  
5

### 6 **Acknowledgements:**

7  
8 The research team would like to thank all of the participants in the project – people living  
9 with PCA, family members who supported them to take part, and the clinicians who took  
10 part. We would also like to acknowledge the contributions made by members of the UCL  
11 PCA Support Group, who provided advice on the initial development of the research  
12 question and on the feasibility of the proposed approach to the project / project design.  
13

14 The team would also like to acknowledge the support provided by Topcon UK through the  
15 generous loan of items of optometric equipment.  
16

### 17 **Funding**

18  
19  
20 University College London funded this study through supporting the staff that undertook the  
21 project, and providing the venue and the catering.  
22

23 The College of Optometrists funded this study through supporting the staff that undertook  
24 the project, and paying for the delivery of relevant equipment, the transcribing of recordings,  
25 the consultant's time in undertaking interviews and analysing the results, and the relevant  
26 expenses of the practitioners.  
27

28 Tim Shakespeare was supported by an Alzheimer's Research UK Research Fellowship.  
29

30 Sebastian Crutch was supported by a grant from ESRC/NIHR (ES/L001810/1).  
31  
32  
33  
34  
35  
36  
37  
38  
39  
40  
41  
42  
43  
44  
45  
46  
47  
48  
49  
50  
51  
52  
53  
54  
55  
56  
57  
58  
59  
60

## References

- [1] Mendez M, F, Ghajarian M, Perryman K, M, (2002) Posterior Cortical Atrophy: Clinical Characteristics and Differences Compared to Alzheimer's Disease. *Dement Geriatr Cogn Disord*;14:33-40.
- [2] Rizzo M, Vecera, S.P. (2002) Psychoanatomical substrates of Bálint's syndrome *J Neurol Neurosurg Psychiatry* 2002;72:162-178.
- [3] Tang-Wai, D. F. Graff-Radford, N.R. Boeve, B. F. Dickson, D. W. Parisi, J. E. Crook, R. Caselli, R. J. Knopman, D. S. Petersen, R. C. (2004) 'Clinical, genetic, and neuropathologic characteristics of posterior cortical atrophy'. *Neurology Oct* 2004, 63 (7) 1168-1174; DOI:10.1212/01.WNL.0000140289.18472.15.
- [4] Crutch SJ, Schott JM, Rabinovici GD, Murray M, Snowden JS, van der Flier WM, Dickerson BC, Vandenberghe R, Ahmed S, Bak TH, Boeve BF, Butler C, Cappa SF, Ceccaldi M, de Souza LC, Dubois B, Felician O, Galasko D, Graff-Radford J, Graff-Radford NR, Hof PR, Krolak-Salmon P, Lehmann M, Magnin E, Mendez MF, Nestor PJ, Onyike CU, Pelak VS, Pijnenburg Y, Primativo S, Rossor MN, Ryan NS, Scheltens P, Shakespeare TJ, Suárez González A, Tang-Wai DF, Yong KX, Carrillo M, Fox NC; Alzheimer's Association ISTAART Atypical Alzheimer's Disease and Associated Syndromes Professional Interest Area. Consensus classification of posterior cortical atrophy. *Alzheimer's & Dementia* 2017. pii: S1552-5260(17)30040-7. doi: 10.1016/j.jalz.2017.01.014.
- [5] Snowden, J. S. Stopford, C. L. Julien, C. L. Thompson, J.C. Davidson, Y. Gibbons, L. Pritchard, A. Lendon, C. L. Richardson, A. M. Varma, A. Neary, D. Mann, D.M. A. (2007) Cognitive Phenotypes in Alzheimer's Disease and Genetic Risk, *Cortex*, Volume 43, Issue 7, 2007, Pages 835-845, ISSN 0010-9452, [https://doi.org/10.1016/S0010-9452\(08\)70683-X](https://doi.org/10.1016/S0010-9452(08)70683-X).
- [6] Galton CJ<sup>1</sup>, Patterson K, Xuereb JH, Hodges JR. (2000) 'Atypical and typical presentations of Alzheimer's disease: a clinical, neuropsychological, neuroimaging and pathological study of 13 cases.' *Brain*. 2000 Mar;123 Pt 3:484-98.
- [7] Schott, J. M. et al. (2016) 'Genetic risk factors for the posterior cortical atrophy variant of Alzheimer's disease'. *Alzheimer's & Dementia: The Journal of the Alzheimer's Association* , Volume 12 , Issue 8 , 862 - 871. DOI: <https://doi.org/10.1016/j.jalz.2016.01.010>.
- [8] Yong, K. X. X.; Shakespeare, T. J.; Cash, D.; Henley, S. M. D.; Warren, J.D.; Crutch, S. J. (2014) (Con)text-specific effects of visual dysfunction on reading in posterior cortical atrophy'. *Cortex*, Volume 57, 2014, Pages 92-106, ISSN 0010-9452, <https://doi.org/10.1016/j.cortex.2014.03.010>. (<http://www.sciencedirect.com/science/article/pii/S001094521400104X>)
- [9] Zakzanis, K. K.; Kielar, A.; Young, D. A.; Boulos, M. (2001) ' Neuropsychological differentiation of late onset schizophrenia and frontotemporal dementia.' *Cognitive Neuropsychiatry*, Volume 6, Number 1, 1 February 2001, pp. 63-77(15). *Routledge, part of the Taylor & Francis Group*. DOI: <https://doi.org/10.1080/13546800042000052>.
- [10] Crutch, S. J., Lehmann, M., Schott, J. M., Rabinovici, G. D., Rossor, M. N., & Fox, N. C. (2012). Posterior cortical atrophy. *The Lancet Neurology*, 11(2), 170–178.

- 1  
2  
3 [11] Kitzinger J. Qualitative research: introducing focus groups. *BMJ* 1995;311:299–302.  
4  
5 [12] Owsley C, McGwin G, Scilley K, et al. Perceived barriers to care and attitudes about  
6 vision and eye care: focus groups with older African Americans and eye care providers.  
7 *Invest Ophthalmol Vis Sci* 2006;47:2797–802.  
8  
9 [13] Lacey J, Cate H, Broadway D. Barriers to adherence with glaucoma medications: a  
10 qualitative research study. *Eye* 2008;23:924–32  
11  
12 [14] Laine C, Davidoff F, Lewis CE, et al. Important elements of outpatient care: a  
13 comparison of patients' and physicians' opinions. *Ann Intern Med* 1996;125:640–5.  
14  
15 [15] University College, London Rare Dementias Group – PCA support group -  
16 [www.raredementiasupport.org](http://www.raredementiasupport.org)  
17  
18 [16] Queen Square tests for visual and cognitive deficits (Green Book and Blue Book) are  
19 available here: [https://onlinestore.ucl.ac.uk/product-catalogue/faculty-of-brain-sciences-](https://onlinestore.ucl.ac.uk/product-catalogue/faculty-of-brain-sciences-c07/ucl-institute-of-neurology-d07/d07-the-queen-square-screening-test-for-visual-deficits)  
20 [c07/ucl-institute-of-neurology-d07/d07-the-queen-square-screening-test-for-visual-deficits.](https://onlinestore.ucl.ac.uk/product-catalogue/faculty-of-brain-sciences-c07/ucl-institute-of-neurology-d07/d07-the-queen-square-screening-test-for-visual-deficits)  
21  
22 [17] Tong, A. Sainsbury, P. and Craig, J. (2007) Consolidated criteria for reporting qualitative  
23 research (COREQ): a 32-item checklist for interviews and focus groups *International*  
24 *Journal for Quality in Health Care*, Volume 19, Issue 6, 1 December 2007, Pages 349–  
25 357, <https://doi.org/10.1093/intqhc/mzm042>  
26  
27 [18] O'Brien BC, Harris IB, Beckman TJ, Reed DA, Cook DA. Standards for reporting  
28 qualitative research: a synthesis of recommendations. *Academic Medicine*, Vol. 89, No. 9 /  
29 Sept 2014 DOI: 10.1097/ACM.0000000000000388  
30  
31 [19] Bowen M, Edgar DF, Hancock B, Haque S, Shah R, Buchanan S, et al. The Prevalence  
32 of Visual Impairment in People with Dementia (the ProVIDe study): a cross sectional study  
33 of 60-89 year old people with dementia and qualitative exploration of individual, carer and  
34 professional perspectives. *Health Serv Deliv Res* 2016;4(21)  
35  
36 [20] Pope C, Ziebland S, Mays N. Qualitative research in health care:  
37 analysing qualitative data. *BMJ* 2000;320:114.  
38  
39 [21] Pope C, Ziebland S, Mays N. Qualitative research in health care:  
40 analysing qualitative data. *BMJ* 2000;320:114.  
41  
42 [22] Glen FC, Baker H, Crabb DP. A qualitative investigation into patients' views on visual  
43 field testing for glaucoma monitoring. *BMJ Open* 2014;4:e003996. doi:10.1136/bmjopen-  
44 2013-003996.  
45  
46 [23] American Macular degeneration Foundation – Amsler Chart -  
47 <https://www.macular.org/amsler-chart>  
48  
49 [24] Pelak, V. S., Smyth, S. F., Boyer, P. J., & Filley, C. M. (2011). Computerized visual field  
50 defects in posterior cortical atrophy. *Neurology*, 77(24), 2119–2122.  
51  
52 [25] Faes, L., Bodmer, N. S., Bachmann, L. M., Thiel, M. A., & Schmid, M. K. (2014).  
53 Diagnostic accuracy of the Amsler grid and the preferential hyperacuity perimetry in the  
54 screening of patients with age-related macular degeneration: systematic review and meta-  
55 analysis. *Eye*, 28(7), 788–796. <http://doi.org/10.1038/eye.2014.104>  
56  
57  
58  
59  
60

1  
2  
3  
4 [26] Beh SC, Muthusamy B, Calabresi P, *et al* (2014) Hiding in plain sight: a closer look at  
5 posterior cortical atrophy *Practical Neurology* Published Online First: 12 September  
6 2014. doi: 10.1136/practneurol-2014-000883  
7  
8  
9  
10  
11  
12  
13  
14  
15  
16  
17  
18  
19  
20  
21  
22  
23  
24  
25  
26  
27  
28  
29  
30  
31  
32  
33  
34  
35  
36  
37  
38  
39  
40  
41  
42  
43  
44  
45  
46  
47  
48  
49  
50  
51  
52  
53  
54  
55  
56  
57  
58  
59  
60

For peer review only

1  
2  
3  
4  
5  
6  
7  
8  
9  
10  
11  
12  
13  
14  
15  
16  
17  
18  
19  
20  
21  
22  
23  
24  
25  
26  
27  
28  
29  
30  
31  
32  
33  
34  
35  
36  
37  
38  
39  
40  
41  
42  
43  
44  
45  
46  
47  
48  
49  
50  
51  
52  
53  
54  
55  
56  
57  
58  
59  
60

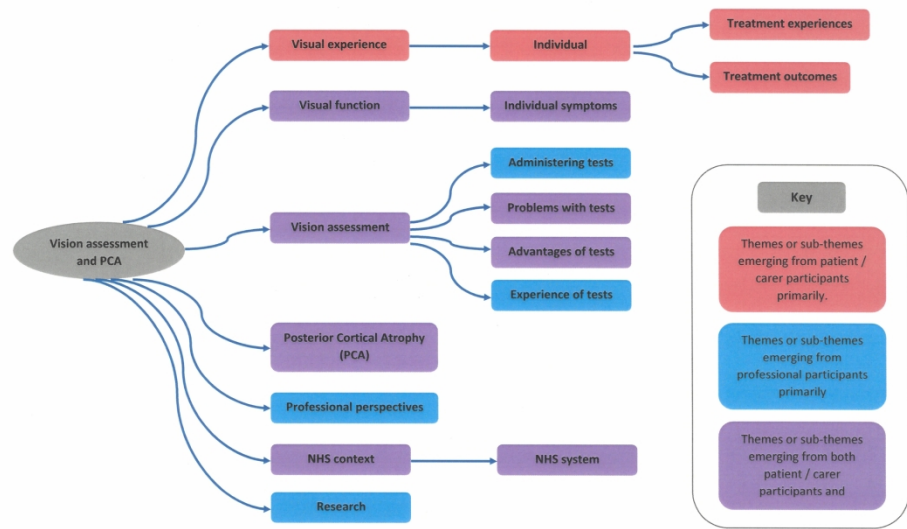

Figure 1: Themes and sub-themes identified in the framework analysis

209x148mm (300 x 300 DPI)

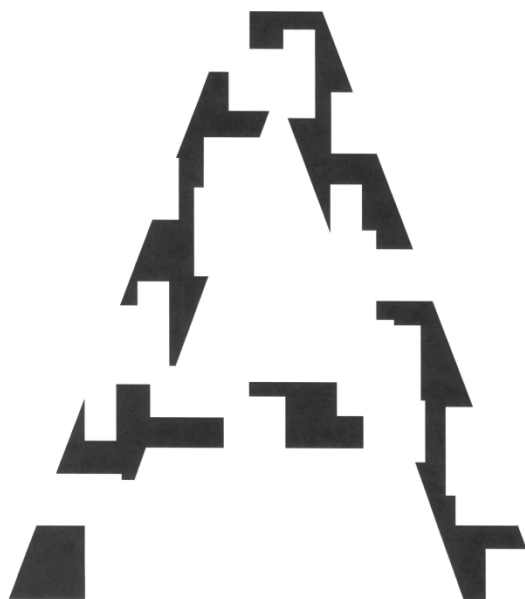

Figure 2 - example of a fragmented letter

209x148mm (300 x 300 DPI)

## Standards for Reporting Qualitative Research (SRQR)\*

<http://www.equator-network.org/reporting-guidelines/srqr/>

Page/line no(s).

### Title and abstract

|                                                                                                                                                                                                                                                              |        |
|--------------------------------------------------------------------------------------------------------------------------------------------------------------------------------------------------------------------------------------------------------------|--------|
| <p><b>Title</b> - Concise description of the nature and topic of the study Identifying the study as qualitative or indicating the approach (e.g., ethnography, grounded theory) or data collection methods (e.g., interview, focus group) is recommended</p> | Page 1 |
| <p><b>Abstract</b> - Summary of key elements of the study using the abstract format of the intended publication; typically includes background, purpose, methods, results, and conclusions</p>                                                               | Page 2 |

### Introduction

|                                                                                                                                                                     |             |
|---------------------------------------------------------------------------------------------------------------------------------------------------------------------|-------------|
| <p><b>Problem formulation</b> - Description and significance of the problem/phenomenon studied; review of relevant theory and empirical work; problem statement</p> | Pages 2 - 3 |
| <p><b>Purpose or research question</b> - Purpose of the study and specific objectives or questions</p>                                                              | Pages 3 - 4 |

### Methods

|                                                                                                                                                                                                                                                                                                                                                                                                             |                     |
|-------------------------------------------------------------------------------------------------------------------------------------------------------------------------------------------------------------------------------------------------------------------------------------------------------------------------------------------------------------------------------------------------------------|---------------------|
| <p><b>Qualitative approach and research paradigm</b> - Qualitative approach (e.g., ethnography, grounded theory, case study, phenomenology, narrative research) and guiding theory if appropriate; identifying the research paradigm (e.g., postpositivist, constructivist/ interpretivist) is also recommended; rationale**</p>                                                                            | Pages 4, 9 and 10   |
| <p><b>Researcher characteristics and reflexivity</b> - Researchers' characteristics that may influence the research, including personal attributes, qualifications/experience, relationship with participants, assumptions, and/or presuppositions; potential or actual interaction between researchers' characteristics and the research questions, approach, methods, results, and/or transferability</p> | Pages 1,5, 6 and 10 |
| <p><b>Context</b> - Setting/site and salient contextual factors; rationale**</p>                                                                                                                                                                                                                                                                                                                            | Page 6              |
| <p><b>Sampling strategy</b> - How and why research participants, documents, or events were selected; criteria for deciding when no further sampling was necessary (e.g., sampling saturation); rationale**</p>                                                                                                                                                                                              | Page 5              |
| <p><b>Ethical issues pertaining to human subjects</b> - Documentation of approval by an appropriate ethics review board and participant consent, or explanation for lack thereof; other confidentiality and data security issues</p>                                                                                                                                                                        | Page 5              |
| <p><b>Data collection methods</b> - Types of data collected; details of data collection procedures including (as appropriate) start and stop dates of data collection and analysis, iterative process, triangulation of sources/methods, and modification of procedures in response to evolving study findings; rationale**</p>                                                                             | Pages 4, 5, 6, 7    |

|                       |                                                                                                                                                                                                                                                       |                  |
|-----------------------|-------------------------------------------------------------------------------------------------------------------------------------------------------------------------------------------------------------------------------------------------------|------------------|
| 1<br>2<br>3<br>4<br>5 | <b>Data collection instruments and technologies</b> - Description of instruments (e.g., interview guides, questionnaires) and devices (e.g., audio recorders) used for data collection; if/how the instrument(s) changed over the course of the study | Pages 4, 5, 6, 7 |
| 6<br>7<br>8           | <b>Units of study</b> - Number and relevant characteristics of participants, documents, or events included in the study; level of participation (could be reported in results)                                                                        | Pages 6, 7, 8, 9 |
| 9<br>10<br>11<br>12   | <b>Data processing</b> - Methods for processing data prior to and during analysis, including transcription, data entry, data management and security, verification of data integrity, data coding, and anonymization/de-identification of excerpts    | Pages 8 and 9    |
| 13<br>14<br>15<br>16  | <b>Data analysis</b> - Process by which inferences, themes, etc., were identified and developed, including the researchers involved in data analysis; usually references a specific paradigm or approach; rationale**                                 | Pages 8 and 9    |
| 17<br>18<br>19<br>20  | <b>Techniques to enhance trustworthiness</b> - Techniques to enhance trustworthiness and credibility of data analysis (e.g., member checking, audit trail, triangulation); rationale**                                                                | Page 8           |

## Results/findings

|                      |                                                                                                                                                                                                   |                |
|----------------------|---------------------------------------------------------------------------------------------------------------------------------------------------------------------------------------------------|----------------|
| 23<br>24<br>25<br>26 | <b>Synthesis and interpretation</b> - Main findings (e.g., interpretations, inferences, and themes); might include development of a theory or model, or integration with prior research or theory | Pages 8, 9, 10 |
| 27<br>28<br>29       | <b>Links to empirical data</b> - Evidence (e.g., quotes, field notes, text excerpts, photographs) to substantiate analytic findings                                                               | Pages 9 to 15  |

## Discussion

|                                  |                                                                                                                                                                                                                                                                                                                                                                                                             |               |
|----------------------------------|-------------------------------------------------------------------------------------------------------------------------------------------------------------------------------------------------------------------------------------------------------------------------------------------------------------------------------------------------------------------------------------------------------------|---------------|
| 32<br>33<br>34<br>35<br>36<br>37 | <b>Integration with prior work, implications, transferability, and contribution(s) to the field</b> - Short summary of main findings; explanation of how findings and conclusions connect to, support, elaborate on, or challenge conclusions of earlier scholarship; discussion of scope of application/generalizability; identification of unique contribution(s) to scholarship in a discipline or field | Pages 9 to 15 |
| 38<br>39                         | <b>Limitations</b> - Trustworthiness and limitations of findings                                                                                                                                                                                                                                                                                                                                            | Page 15       |

## Other

|                |                                                                                                                                               |         |
|----------------|-----------------------------------------------------------------------------------------------------------------------------------------------|---------|
| 42<br>43<br>44 | <b>Conflicts of interest</b> - Potential sources of influence or perceived influence on study conduct and conclusions; how these were managed | Page 16 |
| 45<br>46       | <b>Funding</b> - Sources of funding and other support; role of funders in data collection, interpretation, and reporting                      | Page 16 |

\*The authors created the SRQR by searching the literature to identify guidelines, reporting standards, and critical appraisal criteria for qualitative research; reviewing the reference lists of retrieved sources; and contacting experts to gain feedback. The SRQR aims to improve the transparency of all aspects of qualitative research by providing clear standards for reporting qualitative research.



1  
2  
3  
4  
5  
6  
7  
8  
9  
10  
11  
12  
13  
14  
15  
16  
17  
18  
19  
20  
21  
22  
23  
24  
25  
26  
27  
28  
29  
30  
31  
32  
33  
34  
35  
36  
37  
38  
39  
40  
41  
42  
43  
44  
45  
46  
47  
48  
49  
50  
51  
52  
53  
54  
55  
56  
57  
58  
59  
60

\*\*The rationale should briefly discuss the justification for choosing that theory, approach, method, or technique rather than other options available, the assumptions and limitations implicit in those choices, and how those choices influence study conclusions and transferability. As appropriate, the rationale for several items might be discussed together.

**Reference:**

O'Brien BC, Harris IB, Beckman TJ, Reed DA, Cook DA. **Standards for reporting qualitative research: a synthesis of recommendations.** *Academic Medicine*, Vol. 89, No. 9 / Sept 2014  
DOI: 10.1097/ACM.0000000000000388

For peer review only

# BMJ Open

**A qualitative, exploratory pilot study, to investigate how people living with posterior cortical atrophy, their carers and clinicians experience tests used to assess vision.**

|                                 |                                                                                                                                                                                                                                                                                                          |
|---------------------------------|----------------------------------------------------------------------------------------------------------------------------------------------------------------------------------------------------------------------------------------------------------------------------------------------------------|
| Journal:                        | <i>BMJ Open</i>                                                                                                                                                                                                                                                                                          |
| Manuscript ID                   | bmjopen-2017-020905.R2                                                                                                                                                                                                                                                                                   |
| Article Type:                   | Research                                                                                                                                                                                                                                                                                                 |
| Date Submitted by the Author:   | 12-Dec-2018                                                                                                                                                                                                                                                                                              |
| Complete List of Authors:       | Bowen, Michael; The College of Optometrists, Research<br>Zutshi, Harry; College of Optometrists, Research<br>Cordiner, Martin; The College of Optometrists,<br>Crutch, Sebastian; University College London Institute of Neurology<br>Shakespeare, Tim; University College London Institute of Neurology |
| <b>Primary Subject Heading</b>: | Neurology                                                                                                                                                                                                                                                                                                |
| Secondary Subject Heading:      | Ophthalmology, Qualitative research, Geriatric medicine                                                                                                                                                                                                                                                  |
| Keywords:                       | MENTAL HEALTH, Neuro-ophthalmology < OPHTHALMOLOGY, PRIMARY CARE, Vision, Optometry                                                                                                                                                                                                                      |
|                                 |                                                                                                                                                                                                                                                                                                          |

SCHOLARONE™  
Manuscripts

1  
2  
3 **A qualitative, exploratory pilot study, to investigate how people living with posterior**  
4 **cortical atrophy, their carers and clinicians experience tests used to assess vision**  
5

6 **Authors:**

7 Michael Bowen<sup>1</sup>, Harry Zutshi<sup>1</sup>, Martin Cordiner<sup>1</sup>, Sebastian Crutch<sup>2</sup>, Tim Shakespeare<sup>2</sup>  
8  
9

10 <sup>1</sup> The College of Optometrists, London, UK

11 <sup>2</sup> Dementia Research Centre, University College London, UK  
12

13 **Funding statement:**

14 This work was funded by the College of Optometrists and University College London. Tim  
15 Shakespeare was supported by an Alzheimer's Research UK Research Fellowship.  
16 Sebastian Crutch was supported by a grant from ESRC/NIHR (ES/L001810/1).  
17  
18  
19

20 **Competing interests statement:**

21 None of the authors had any competing interests in relation to this work.  
22

23 **Corresponding author:**

24 Martin Cordiner ([martin.cordiner@college-optometrists.org](mailto:martin.cordiner@college-optometrists.org))  
25  
26

27 **Data sharing statement:**

28 The unedited transcripts of the interviews are held by the College. They are not currently  
29 publicly available.  
30

31 Contact for discussion about possible access to the data should be directed to:  
32 michael.bowen@college-optometrists.org  
33  
34  
35  
36  
37  
38  
39  
40  
41  
42  
43  
44  
45  
46  
47  
48  
49  
50  
51  
52  
53  
54  
55  
56  
57  
58  
59  
60

## Abstract

**Objectives:** To investigate the experiences and views of people living with posterior cortical atrophy (PCA), their family carers and health care professionals of vision assessment tests.

**Design:** a qualitative investigation using video recordings of vision assessments, semi-structured interviews, and audio recordings of a focus group. Interviews and focus group used broad, open questions around the topic to prompt and guide discussion. Video and audio recordings were transcribed, manually coded and analysed using framework analysis.

**Setting:** University College, London's Queen's Square neurology centre provided the venues for all stages of the research.

**Participants:** Participants living with PCA were 1 male and two females (age range 67 to 78 years). Health professional participants were a neurologist (male), two ophthalmologists (male) and an optometrist (female).

**Primary and secondary outcomes:** (1) Experiences and attitudes of people living with PCA and health professionals to vision assessment tests (2) views of health professionals and people living with PCA of whether some tests are more effective at discriminating between cortical vision problems and vision problems related to optical or ocular causes.

**Results:** Patients were able to engage with and complete a number of tests. Their partners played a vital role in the process. Participants reported that simple, short tests were more effective than more subjective tests. Examples of tests that appeared to be more problematic for the patient participants were the Amsler Grid and visual field analysis.

**Conclusions:** Although limited in scope and execution, the project suggests that some vision assessment tests are likely to support health professionals to discriminate between cortical and optical / ocular causes of visual impairment. It supports existing evidence that there are vision assessments that people with dementia can engage with and complete. We identify areas of importance for future research and make tentative suggestions for clinical practice.

### Strengths and limitations of this exploratory pilot study

- Small sample of patients took part in the study.
- Potential variation in the relative progression of PCA between the participants may have been a confounding factor
- Undertaken outside of usual clinical settings (due to multidiscipline approach), so patients might have performed differently in each discipline's normal clinical environment.
- Views on the experiences of both patients and practitioners in relation to each consultation captured separately, verbatim, and on the day the consultations were undertaken.
- Multidisciplinary approach, incorporating optometric, ophthalmological and neurological screening tests.

## Introduction

Posterior cortical atrophy (PCA) involves progressive visual dysfunction and a degeneration of the posterior brain's outer layer (the cortex). It is most commonly caused by Alzheimer's disease, although may also be caused by dementia with Lewy bodies, corticobasal degeneration or Creutzfeldt–Jakob disease [1]. The visual dysfunction experienced can encompass aspects of visuospatial and visuoperceptual processing. Features of Balint's syndrome (e.g. simultanagnosia, oculomotor apraxia) and of Gerstmann's syndrome (including acalculia and agraphia) are common [2, 3, and 4].

First described in 1988, consensus criteria for PCA have only recently been agreed [5] and diagnosis is often delayed or absent. The fact that it often goes unrecognised means that a prevalence figure is hard to estimate (some studies have suggested about 5% of those diagnosed with early onset Alzheimer's disease may have PCA, [6]). Most Alzheimer's disease cases appear in people over 65, but PCA tends to occur between 50 and 65 [7 and 8].

People living with PCA often present to optometrists and ophthalmologists with non-specific visual problems, but unless the clinician specifically looks for the signs and symptoms of PCA, it may not be picked up. It is not uncommon for people living with PCA to report delays from first presentation with visual symptoms to final diagnosis of PCA of many years. Investigating how vision assessment is experienced by people living with PCA, and the health professionals' perspectives of conducting such assessments may offer insights into how to improve the process, and could provide scope for identifying tests that may be particularly useful in supporting clinicians to distinguish between visual symptoms with optical / ocular causes and those with cortical origins.

Individuals with PCA offer a unique perspective on the visual difficulties which may be experienced by many individuals with typical Alzheimer's, at a point when the memory, language and insight problems of the latter group limit their ability to communicate what they are experiencing. Also, the nature of cortical visual problems in PCA can confound the use of standard optometric assessments. For example, the majority of PCA patients have normal or near-normal visual acuity, yet may struggle with a standard Snellen letter chart because of a reduced effective field of vision, and so can find it easier to read smaller, rather than larger, fonts. They may also struggle with excessive visual crowding in their central vision, resulting in difficulty reading letters surrounded by other letters or clutter [9], another common trait of optometric testing charts.

### **Purpose:**

The complexities of both diagnosing PCA [10 and 5] and the reality that - given the complexities introduced by the cortical visual perceptual symptoms associated with PCA - it may be complicated for optometrists and ophthalmologists to work with people living with PCA to find the most appropriate approach to correcting visual impairment, to produce the best possible visual experience, presented an opportunity for productive collaboration across the disciplines of optometry, ophthalmology, neurology and neuropsychology, to investigate the following research questions:

- How do people living with posterior cortical atrophy (PCA) experience various tests used to assess vision? What are the experiences of health professionals of administering these tests when examining people living with PCA?

- Are there particular tests for assessing vision that are more effective at discriminating between cortical vision problems and vision problems related to optical or ocular causes?

Qualitative methodologies, such as semi-structured interviews, focus groups [11], and content analysis (or video / audio transcripts for example) offer an effective way to collect information about what patients think, how they think, or why they may hold a particular view. Interactions between participants in groups can encourage participants to explore and clarify individual and shared perspectives and may support participation by people who may be reluctant to contribute their views in a more formal one-to-one scenario [12]

There is limited qualitative evidence from people living with PCA, or the health professions involved in assessing vision for individuals in this group about the experiences of having vision assessed, or assessing vision. In particular, there is little patient and clinician data about the experience of administering or being assessed using various standard tests. Focus groups have been used in a small number of studies to examine the general experiences of people living with conditions such as glaucoma, which require regular vision assessments [13, 14].

However, there is limited evidence relating to the opinions of patients living with PCA, or clinicians, about the tests used to assess vision. Anecdotal evidence suggests that patients dislike performing the VF test, but no study has interviewed patients with living with PCA in detail about their perceptions of the tests used by various health professionals to assess vision and visual perception. Such evidence could begin to shed light on how tests are experienced, and whether some tests may prove both more acceptable / accessible, and better able to support professionals in discriminating between cortical and optical / ocular causes of visual problems.

This project was structured as an initial exploration of the qualitative experiences of people living with PCA and health professionals. The project was designed to gather rich qualitative data, although the limited sample size reduced the scope for definitive conclusions in relation to these questions to be reached. The intention was to explore the potential for gathering and analysing this type of data, with this participant group, with a view to informing the development of subsequent research. In addition to investigating the viability of such research, the project was intended to provide some insights into potential target tests and vision assessment methods of particular interest, to enhance and inform clinical practice and increase awareness of dementia-related cortical visual impairment through improved training and access to resources. It was also anticipated that it might enable further research to be more focused.

## Methods

### Participants

Vision assessments and post-assessment interviews took place over the course of a day at University College London's (UCL) Dementia Research Centre at Queen Square in London, in February 2016. This location was selected as it was familiar and accessible to participants living with PCA, convenient to the clinicians participating, and had the scope to support the relevant equipment and filming required. A focus group was then held for the health professionals involved (as well as one other ophthalmologist invitee) in March 2016, to analyse footage selected from the vision assessments (footage was selected by HZ and MB

1  
2  
3 initially, and reviewed by SC and TS before inclusion) and discuss a schedule of questions  
4 developed by the study team.  
5

6  
7 The study used purposeful sampling, whereby suitable participants living with PCA were  
8 selected by the UCL team from the Rare Dementia Support PCA support group membership  
9 [15] ([www.raredementiasupport.org](http://www.raredementiasupport.org)), based on their ability and willingness to attend and on  
10 the need to have participants with a range of PCA presentations. Participants with PCA had  
11 a diagnosis consistent with the core clinico-radiological syndrome [10]. Although all  
12 individuals presented with progressive decline in visual processing and relatively intact  
13 memory in the early stages, some impairments of episodic memory were apparent at the  
14 time of this study.  
15

16  
17 At present in the UK many people living with early PCA are first referred into secondary care  
18 services by optometrists working in community settings. These referrals are frequently not  
19 identified as suspected PCA and due to the lack of any current referral pathways from  
20 primary care optometry to secondary care neurology services, the referral route is nearly  
21 always to the optometry or ophthalmology functions of hospital eye services. For these  
22 reasons the project aimed to include vision testing techniques from several different health  
23 care disciplines, to gain insights into possible differences at the various access and referral  
24 points. This meant that the logistics of the testing and interview schedule (in particular the  
25 time taken to complete each stage) restricted the number of participants to three people with  
26 PCA (one male, two female, age range 67 to 78).  
27  
28

29  
30 Participants with PCA were given an information sheet with brief details of the purpose and  
31 programme of the day - to gather data about the experience of having vision and eye health  
32 assessed by a range of clinicians. A member of the research team provided the information  
33 verbally to participants with reading difficulties and checked with each participant that they  
34 had understood the information provided and answered any questions that the participant or  
35 their family member had. Written consent to participate in the research was received, along  
36 with written consent relating to the video recording of the examination sessions and  
37 interviews. Participants were informed in writing and reminded verbally on the day that they  
38 could withdraw from the project at any time. Each participant with PCA was accompanied by  
39 a family member throughout the processes of the day.  
40  
41

42  
43 Three clinicians took part on the vision assessment day - an optometrist, a neurologist and  
44 an ophthalmologist (one female and two male), and they were given briefing information  
45 about the testing they would be asked to carry out and the post-testing interviews. Consent  
46 for participation and video recording of the assessments and audio recording of the focus  
47 group was received from each of the professional participants. The professional participants  
48 had varying experience of assessing vision in people with dementia or PCA. The optometrist  
49 had more than 20 years of experience in primary and secondary care settings, and had  
50 encountered numerous people living with dementia and some people living with PCA. The  
51 neurologist was an experienced consultant neurologist with more than 20 years of clinical  
52 and research experience working with numerous people living with PCA. The  
53 ophthalmologist was more recently qualified, and had encountered few people living with  
54 PCA.  
55

56  
57 The study conformed to the Declaration of Helsinki, and written consent to participate and for  
58 video recording and audio recording was obtained for all participants, prior to the  
59 examinations / interviews and focus groups. The study was approved by the Queen Square  
60 Research Ethics Committee.

## Procedure

Each patient participant completed three sequential vision assessments with an optometrist, ophthalmologist and neurologist, with their partner in attendance. After each assessment, the patient participant and their partner completed a brief interview, as did each clinician.

In advance of the testing day, semi-structured interview schedules were developed for the post-examination interviews with the clinicians and people with PCA. Following the day of vision assessments, HZ and MB prepared a schedule of questions / topics for the clinicians' focus group (which took place two weeks after the vision assessment day to allow time for video footage to be reviewed and selections made for presentation to the focus group), informed by the themes arising during the eye examinations and post-examination interviews.

## Vision assessment protocol

Each of the three health professionals was asked to assess the vision of each of the three participants in a manner that followed as closely as possible the methods they would use in their usual clinical practice. Professional participants were asked to approach the assessments as closely as possible to their usual practice.

These broad test protocols equated to: optometrist - primary care General Ophthalmic Services sight test [16]; ophthalmologist - general secondary care hospital eye service general referral (refraction clinic) vision assessment; neurologist - the visual perceptual elements of a routine neurological examination.

Each clinician was provided with as much of the equipment for assessing vision that they would usually have available.

Equipment available was as follows:

Hand held slit-lamp (Keeler)

Tonometer - CT-80 (table mounted)

Field screener - Henson 9000

Ophthalmoscope

Retinoscope

Indirect ophthalmoscope (Keeler)

Prism bar

Cross-cyl test lenses

Trial frame

Trial frame lens set

Focimeter (Pentax)

Volk lens

20D lens

Tests / Charts:

Standard Snellen Chart

Thompson Software Electronic test chart software (running on an Apple iPad) - including cross-cyl and near reading

Near reading test chart - cards

Ishihara colour vision test cards



1  
2  
3 Frisby stereo test chart  
4 Cardiff cards or Teller visual acuity cards  
5

6 The Queen Square Screening Test for Visual Deficits (The Blue Book)[17].  
7 The Queen Square Screening Test for Cognitive Deficits (The Green Book)[17].  
8  
9

10 As the primary objective of the study was not to investigate a specific vision assessment  
11 procedure, or test sequence, the health professionals were not given a specific sequence for  
12 test elements. They were asked to take the approach to vision assessment / sight testing  
13 that they would usually follow in their practice setting.  
14

15 These were the agreed key assessments that the health professionals suggested would  
16 generally be included in their usual assessments:  
17

18  
19 Neurologist's assessment:

- 20 - medical history
- 21 - general examination
- 22 - eye signs (visual fields on confrontation, eye movements)
- 23 - limb signs  
24

25 Ophthalmologist's / Optometrist's assessment:

- 26 - medical history
- 27 - ophthalmoscopy.
- 28 - retinoscopy
- 29 - slit-lamp examination
- 30 - subjective and objective refraction
- 31 - convergence
- 32 - ocular motility
- 33 - pupil reflexes
- 34 - intraocular pressure (tonometry)
- 35 - visual fields
- 36 - accommodation  
37  
38

39 The order of optometry, ophthalmology and neurology assessments was varied between  
40 participants in an ABC BCA CAB design, with each assessment followed by an interview.  
41

## 42 **Interview and focus group procedures**

43  
44

45 The interview and focus group schedules were developed following initial discussions within  
46 the study team. The topics identified and included within the schedules served only as a  
47 guide for the interviews and focus group. The order in which topics were addressed in  
48 interviews was not rigidly applied and question wording was not prescribed in advance.  
49 Where considered helpful, prompts were used by the interviewer / focus group facilitator to  
50 introduce topics and to encourage participants to expand on their comments. However, the  
51 core of the discussion came from the participants and care was taken to use open questions  
52 and to avoid unduly leading the conversations.  
53  
54

55 Although the patient participants were aware that they were going to have their eyes  
56 examined and vision assessed by the clinicians, they were not made explicitly aware of the  
57 focus of the study being to identify how tests were experienced and whether any tests were  
58 particularly good or bad when being used with someone with PCA. All interviews, and the  
59 facilitation of the clinicians' focus group, were conducted by one of the investigators (HZ).  
60

1  
2  
3 The professionals' focus group was co-facilitated by MB. The interviewer and participants  
4 had not met each other prior to the testing day, so introductions were made prior to the first  
5 interviews. In addition to the video recordings, the interviewer took field notes during the  
6 interviews. This note taking was intentionally kept to a minimum to enable the interviewer to  
7 attend as fully as possible to the interviews. During the focus group other members of the  
8 investigation team took notes to free the facilitator to focus on the discussion.  
9 Each post-examination interview lasted around 5 minutes - these interviews were  
10 intentionally kept brief to manage the time / energy demands of a long day of testing for the  
11 participants. Each filmed examination session lasted approximately 20-30 minutes. The  
12 clinicians' focus group lasted for about three and a half hours, with a 15-minute break in the  
13 middle.  
14  
15

16  
17 Consolidated Criteria for Reporting Qualitative Research (COREQ) guidelines were followed  
18 in the design and reporting of the study [18]. A SRQR (Systematic Reporting of Qualitative  
19 Research) checklist was completed to ensure that the final paper complied with these  
20 guidelines [19].  
21  
22

#### 23 Patient and public involvement:

24  
25  
26 The research question was developed following patient and public data collected during the  
27 PrOVIDe study (708 participants) [20], and also from discussions with members of the UCL  
28 PCA Support Group at one of their regular meetings (60 attendees).  
29

30 Potential participants (members of the UCL PCA Support Group) were asked about the  
31 feasibility of the design, and any specific concerns and interests prior to the final design  
32 being confirmed.  
33  
34

35 Patients were not directly involved in the collection or analysis of data in this project, nor in  
36 the process of recruiting participants.  
37  
38

39 All those who participated were informed of the outcomes of the vision assessments where  
40 these indicated the need for further investigation / referral. Participants will receive a copy of  
41 the final report and any publications, and these will also be shared with the wider  
42 membership of the PCA Support Group and other relevant patient networks. Notice of  
43 papers will be given in the Alzheimer's Society patient publication.  
44

45 This study was not a randomised controlled trial so there was no trial-related requirement to  
46 assess the burden of the intervention on the patients. However, the team gave careful  
47 thought to the schedule for the day, the provision of breaks and rest periods and made clear  
48 to participants that if the process was too tiring that they could rest or drop out at any time.  
49 Please see acknowledgements.  
50

#### 51 Analysis

52  
53 All vision tests / eye examinations and post-examination interviews were video recorded.  
54 The clinician focus group was audio recorded. The dialogue from the video and audio  
55 recordings was transcribed and reviewed by the investigators. In a small number of  
56 instances certain words were inaudible on the recordings, so field notes were used to  
57 account for any unclear information in those sections. All transcripts were pseudonymised.  
58  
59  
60

The project followed an approach that was broadly constructivist and founded in the concepts of grounded theory. Data were analysed by two of the authors (MB and HZ) independently using framework analysis [21, 22] as shown in **Table 1**. An inductive approach was taken to coding and analysis. Each investigator read and re-read the transcripts and manually identified the key themes from the data. Once the investigators had both completed their independent theme identification, they met to review respective themes and organise the thematic framework, condensing and refining the categories that had been identified and identifying additional themes for exploration. Any differences of opinion regarding the relative importance of themes, or the meanings of sentences were discussed until a consensus was reached.

**Table 1: Framework technique used for data analysis.**

|                                          |                                                                                                                                                                     |
|------------------------------------------|---------------------------------------------------------------------------------------------------------------------------------------------------------------------|
| <b>1. Familiarisation</b>                | Manuscripts are read and re-read independently by investigators.                                                                                                    |
| <b>2. Identifying thematic framework</b> | Themes are identified and then reviewed jointly and a refined / condensed set of themes agreed on.                                                                  |
| <b>3. Coding / Indexing</b>              | Codes are applied to the data systematically by both investigators independently. Coding is then reviewed and discussed until final consensus on coding is reached. |
| <b>4. Charting</b>                       | Data is rearranged in line with thematic content in a manner that supports cross-case and within-case analysis.                                                     |
| <b>5. Mapping and interpretation</b>     | Data is interpreted and conclusions and recommendations drawn.                                                                                                      |

## Findings

Initial coding was completed according to the themes identified and agreed following stages 1 and 2 of the framework in Table 1. During coding additional themes were identified. There were also occasions where it became clear during the coding process that themes initially considered distinct were actually either a single theme or a theme and very closely linked sub-theme. Themes and sub-themes are summarised in **Figure 1**.

## Figure 1: Themes and sub-themes identified.

## Results

All of the participants were able to complete the full sequence of vision assessments with each of the participating professionals. However, within each assessment there was variation regarding the participants' ability to complete individual tests. Although 45 minutes was allowed in the schedule, with the exception of the neurologist, the professional participants found it difficult to complete the tests within the time, or found that the patient participants were finding the testing tiring.

## The test experience

1  
2  
3  
4 Clinicians reported that it was difficult to take a reliable history because of patient memory  
5 problems. They found that the simple, short tests appeared to work the best. Tests that  
6 included too many variables appeared to be less readily administered and were agreed to be  
7 likely to be less effective with these 3 patients. Examples of tests that appeared to be more  
8 problematic for the patient participants were the Amsler Grid [23] and visual field analysis.  
9 Other optometric, ophthalmic and neurological tests were generally reported by the clinicians  
10 as appearing to be more effective; however, more subjective tests such as colour vision,  
11 depth perception and visual acuity were reported by patient participants as being, or seemed  
12 to clinician participants to be more difficult for the patient participants. This was reported as  
13 apparently being due to either difficulty in understanding and / or retaining the instructions or  
14 visuo-perceptual problems in completing the test, or some combination of these. A  
15 neuropsychological test using full and fragmented letters or images (see Figure 2) appeared  
16 to offer potential as a screening test to discriminate between optical / ocular vision problems  
17 and cortical visual deficits. This type of test had the benefit of being short and simple. The  
18 professional participants agreed that this would be a good target for further research.  
19  
20  
21

22 **Figure 2: An example of a fragmented letter, in this case the letter 'A'.**

23  
24  
25  
26  
27 Clinicians noted that patients were affected by their involvement in one test after another.  
28 Fatigue was definitely a factor by the end of the day and within the test process. Patients  
29 would become more distracted, for example when their second eye was being tested. This  
30 meant that the time that testing took was significant. Too long and the patient may become  
31 too tired to continue without a break. Also, the testing process was particularly challenging  
32 for patients as it explored skills that they were once proficient in such as reading, but now  
33 find a struggle. Testing provided constant reminders of this.  
34  
35  
36

37 *'All three patients attempted reading. This is challenging for the patients as it is an aspect of*  
38 *real life they are concerned about anyway. I also checked to see if using your finger as a*  
39 *guide helped with reading but it did not.'*  
40 (Clinician interview 12.2)  
41  
42

43 Patients gave two reasons why they had volunteered to be involved in the testing day. First,  
44 it was a chance to contribute to research into a greater understanding of PCA, as patients  
45 had had difficulties in gaining an accurate diagnosis of their condition in the first place.  
46 Second, it was a chance to find out more up-to-date information about how their disease was  
47 progressing and to check their vision.  
48  
49

50 Patients recognised that vision assessments were generally necessary. Although they all

51  
52 *It is as if I have been smacked in the face ... that sort of feeling that you get when you have*  
53 *blown your nose too hard or been hit in the nose. So that is a physical feeling. It's almost like*  
54 *little hooks being pulled around the eye, it's quite hard work.* (Patient interview 3.4)  
55 remained positive about the process of repeated vision assessments on the day, and were  
56 made aware of the fact that they could stop at any point during the day they also found it  
57 uncomfortable and emotional at times, as it focused on what they were not able to do. As  
58 well as reporting tiredness, it could be experienced as physically unpleasant as well.  
59  
60

1  
2  
3 Patient responses varied greatly across the tests. Some they found easy to do, some were  
4 difficult, while one or two they could not do at all. All patients reported positively on the clarity  
5 of explanation of the test elements by each clinician. They welcomed the fact that key  
6 information was repeated at intervals. These reminders of the key project information  
7 included research team members checking that participants were happy to continue and  
8 ensuring that they were aware that they could take additional breaks between the sessions if  
9 they wished to. Tea / coffee and juice / water were available to participants on request, and  
10 were regularly offered.  
11  
12  
13

14 Patients' partners played a vital role in the testing process. This role went beyond  
15 encouragement and support. It was about helping and prompting patients where they had  
16 memory lapses. They had shared patient frustrations when it had been difficult for clinicians  
17 despite many tests to diagnose PCA in the first place. Patients could turn to their partners for  
18 assurance during the tests, which could be given simply as a nod of encouragement or the  
19 prompt of a correct word.  
20  
21

22 *The real crux of it is to recognise the move from eyes to brain. I am not sure still from the*  
23 *sort of ophthalmic tests we had, which are fairly standard eye tests that even a competent*  
24 *ophthalmologist would pick up necessarily that it is a brain disorder, that it is to do with*  
25 *processing the information.*  
26

27 (Partner comment in patient interview 6.8)  
28  
29

### 30 **Identifying cortical perceptual problems**

31

32 The clinicians reviewed their experience of working with patients with PCA. They argued that  
33 it is important to look at two different aspects of care, pre-diagnosis and post-diagnosis. Pre-  
34 diagnosis there were real concerns about a wide range of clinicians who could potentially be  
35 involved, but who may find it difficult to identify suspect-PCA or to discriminate between  
36 optical / ocular vision problems and cortical perceptual issues.  
37  
38

39 *They come in saying I've got a problem with my eyes, I can't see things and we do our*  
40 *examination and say, actually no, we can't really find any deficit at all, back you go to your*  
41 *GP and really the diagnosis would potentially be missed.*  
42

43 (21 merged coding)  
44  
45

46 They could include optometrists, ophthalmologists, neurologists as well as GPs. If it was  
47 possible to develop a simple test or series of tests to give an indication that a visual  
48 perceptual deficit or condition such as PCA may be involved, then this would be a significant  
49 step forwards and avoid a situation where patients visit a number of clinicians without  
50 anyone coming up with a firm diagnosis. This would also have potential for primary care  
51 settings as well. One clinician also thought it would be useful to involve orthoptists.  
52  
53  
54  
55  
56  
57  
58  
59  
60

1  
2  
3 *Post diagnosis it is still very important that the patient is able to access primary eye care so*  
4 *that they get monitoring of their general eye health and accurate correction of vision defects.*  
5 *(76 merged coding)*  
6  
7  
8  
9

10 Patients thought that they fell between different clinical disciplines, going from one to  
11 another with no definitive diagnosis. Patients often reported a number of common  
12 symptoms. These included not being able to read dot matrix signs in the  
13 underground or on buses, dislike of shiny surfaces and down escalators. A particular  
14 frustration was the ability to read, which might come and go in some patients, or be  
15 fully lost for others.  
16  
17

18 *I was constantly being bumped from pillar to post either at the hospital ophthalmic*  
19 *department or another trying to work out why I couldn't read properly and everything*  
20 *was falling off...things would slide off the page, I would say like icing off a cake.*  
21 *(Patient interview 3.9)*  
22  
23  
24  
25

26 As a result of this, a key priority for patients and their partners was that appropriate systems  
27 were in place to enable early identification of PCA by primary and secondary care  
28 professionals. This meant that a consistent approach was needed across optometry,  
29 ophthalmology and neurology, with clear, effective and prompt communication and referrals  
30 between clinicians.  
31  
32  
33  
34  
35

### 36 **Learning from the tests**

37

38 Clinicians reviewed the learning from the project testing through detailed discussions in the  
39 focus group. There were a number of issues which emerged from this. Using a chart with  
40 lines of letters was far less effective than presenting patients with images of single letters.  
41 Multiple lines often caused patients to mix up letters on different lines. A simple test which  
42 contrasted full and fragmented images or letters was agreed to be the test that provided  
43 clearest evidence of PCA, or symptoms of other cortical vision problems, as patients could  
44 identify the full image but not the fragmented one. This worked with a letter or another object  
45 as the image. Another test was found to be to use photographs of common objects, but from  
46 unusual angles. Patients also experienced other symptoms, which while not necessarily  
47 unusual for people living with PCA or other cortical visual problems, would be relatively  
48 uncommon in most primary care eye health settings.  
49  
50  
51

52 For example, one said she could identify a small crumb on the floor but yet not see a glass  
53 on the table. One neurological test looked at visual disorientation. The patient was asked to  
54 grasp the clinician's finger, but was often unable to do so. It is not uncommon for visual field  
55 defects to be confused with problems and disorders of spatial cognition (such as  
56 simultanagnosia) [24], which may lead to eye health professionals missing a cortical problem  
57 such as PCA. For example, people with simultanagnosia may have serious problems  
58 performing perimetric tests (and thus appear to have limited visual fields), while their visual  
59 field may be intact in terms of their optical system and ocular health [25].  
60

1  
2  
3  
4 *I ask patients to grab my finger. This can look like a field defect, but it is not. Patients can*  
5 *see the hand and can copy the hand movement, yet cannot locate the finger in space. There*  
6 *is an unusual visual field and visual disorientation.*

7  
8 (Clinician interview 12.4)  
9

10  
11 One clinician noted that it would be useful to include a routine slit lamp investigation with the  
12 tests in order to help determine the presence / absence of retinal pathology. Patient  
13 participants did however report that the slit lamp examination was one of the most  
14 unpleasant parts of the optometric assessment. Another thought that it might be worth trying  
15 other field test approaches such as confrontation fields or some of the more recent tablet-  
16 based field tests. Patients experienced particular problems with the visual field analysis. One  
17 patient could not see the light at all, while it 'came and went' for another patient. It is possible  
18 that this was due to optic ataxia, which is not uncommon among people living with PCA, but  
19 in primary eye health practice or general ophthalmology clinics this might not be readily seen  
20 as the most obvious explanation for such an observation [26].  
21  
22

23  
24 *Can you see the light?" and I had to say no, I couldn't. He said, "Can you tell me where the*  
25 *light is?" and I said, "What light?"*

26 (Patient interview 4.5)  
27  
28

29 Patients and partners noted that there could be a cumulative effect of testing which involved  
30 things that they could not do, or skills they had lost. This increased fatigue and made  
31 concentration harder. Sometimes a break was needed.  
32

33  
34 Patients demonstrate awareness that their own memories could be erratic and unreliable.  
35 They were also aware that they could have good and bad days. These factors seemed to be  
36 driving the patient and carer view that test process needed to be flexible enough to  
37 accommodate these different patient responses and needed to take account of their fatigue  
38 and frustration with not being able to do things that were once normal everyday skills.  
39

40  
41 Two of the clinicians indicated that they had greater confidence in running tests for people  
42 with PCA after the testing with the three patients. They both had experience of previous  
43 patients where it was harder to carry out testing. The clinicians were interested to discuss  
44 how what they had learnt from the research could be put into practice within their own work  
45 settings. Making changes such as splitting testing into two parts could help to alleviate some  
46 of the fatigue and distraction. This would not just apply to PCA patients, but also those with  
47 other forms of dementia.  
48

49  
50 The optometrist raised the issue of the length of the average sight test during a standard  
51 day's practice. The traditional 20-minute test was clearly insufficient for what was involved.  
52 She found a good pattern was to alternate 30 minute and 45 minute tests, allowing scope for  
53 patients with more complex needs (56/57 merged coding).  
54

55  
56 Discussions between clinicians reflected patient concerns about the time that it took to get a  
57 correct diagnosis of PCA. Some issues reflected wider problems about the lack of training to  
58 work with patients with dementia. A benefit of the research process was that it had brought  
59 together optometry, ophthalmology and neurology. However, there was a lack of awareness  
60

1  
2  
3 throughout the different disciplines about PCA and this would need to be tackled in the  
4 future. The involvement of primary care, particularly GPs would also be vital to this.  
5

6 *People aren't making the diagnosis always and they're getting misdiagnoses or the patient's*  
7 *being pigeon-holed in the wrong place.*

8  
9 (76 merged coding)  
10

## 11 12 **Future research implications** 13

14 Clinicians expressed particular interest in the implications of this project and its exploration  
15 of tests and the testing process. This was discussed during their one to one interviews, but  
16 particularly in the focus group. It was apparent that there were two broad areas for taking the  
17 research forwards. First, it was important to gain greater clarity about the numbers of  
18 patients with PCA within the broader spectrum of people with dementia. Second, there  
19 needed to be greater awareness of PCA by making use of development opportunities across  
20 the different professions, and data about the current level of understanding would provide a  
21 baseline against which to measure educational interventions.  
22  
23

24  
25 Greater clarity about numbers could be achieved by re-analysing previous tests which have  
26 been used on a larger scale and included full and fragmented letters as part of the wider  
27 test. It may also be possible to add this element to new research as well. However,  
28 discussion emphasised that looking at numbers alone was not enough. If clinicians could not  
29 recognise PCA, they would not be able to diagnose it from the sometimes contradictory  
30 information they may come across from testing patients.  
31

32  
33 *The low hanging fruit as far as a simple research question goes is: what are the three or four*  
34 *things which if you've got two or more of them then you are really thinking, it's not just an*  
35 *eyesight thing it's a brain thing? A test like that could be done in 30 seconds.*

36 (62 merged coding)  
37  
38

39  
40 It was suggested that one way to establish a baseline of understanding of dementia and  
41 PCA in particular would be, 'to run some short surveys with medical students across  
42 optometry, ophthalmology and neurology to gain a clearer understanding of current levels of  
43 awareness' (95 merged coding). This would help to develop such baseline data across the  
44 relevant professions.  
45

46 Previous research (Bowen et al, 2016) has shown that there is a strong association between  
47 visual impairment and the likelihood of being in residential care. The prevalence of visual  
48 impairment from all causes was found to be more than 2.5 times greater in residential home  
49 settings, even allowing for age and severity of dementia. Improving people's visual  
50 functioning will help their quality of life and increase their chances of staying out of  
51 residential care.  
52

53  
54 *I'm always worried that we work in a specialist centre and we get people with particular*  
55 *diagnoses and we've got very little idea of how representative our sample is of the rest of the*  
56 *world.*

57 (103 merged coding)  
58  
59  
60



1  
2  
3 Further research into screening tests for PCA is vital, and was considered to be an important  
4 follow-up to this pilot research by all the clinicians. This would involve identifying a small  
5 group of tests, such as the full and fragmented letters test, and trying them on different  
6 groups of patients. However, a significant factor with any screening test could be the number  
7 of false positives, which it was suggested might lead to too many referrals to neurology.  
8 More elaborate research follow-up could include running tests with a group of patients with  
9 PCA, a group with typical, memory-led Alzheimer's disease and an appropriate control group  
10 (or groups). There may also be other outcomes from existing surveys and other research  
11 that has already been completed, which could be aggregated into a literature review.  
12  
13

14 Existing research has shown that there is a stark difference in the mean onset age for PCA  
15 compared with Alzheimer's disease. A participant pointed out that for PCA this age is 59,  
16 while it is at least 20 years later for Alzheimer's disease (94 merged coding).  
17  
18

### 19 **Limitations**

20  
21 Clinicians expressed some reservations about the fact that tests had only been tried on three  
22 patients. It may be important to look at a wider range of patients as this could highlight other  
23 issues that might not be apparent from this small sample. Given the relatively early average  
24 age of onset of PCA, the ages of the participants in this explorative study means that  
25 additional data from people living with earlier PCA would be important to gather in  
26 subsequent research.  
27  
28

29 The neurologist thought that the project's test process could have benefitted from the use of  
30 a wider range of screening tests. It is possible that some of these would prove more effective  
31 than others. Also, one clinician thought that it had not yet been possible to test the limits of  
32 what the patients could manage within the requirements of the research setting (105 merged  
33 coding) and the resources for testing available, which had not been as extensive as in their  
34 usual clinical settings.  
35  
36

37 However, there was agreement among the clinicians that patients had done much better on  
38 the tests than might be expected, given their complex range of problems (59 merged  
39 coding). This is positive as it provides some further support for the finding that many people  
40 living with dementia could complete most of the key elements of a standard sight test  
41 (Bowen et al, 2016).  
42  
43  
44

### 45 **Conclusions**

46  
47 A simple test which contrasted full and fragmented images or letters was agreed to be the  
48 test that provided clearest evidence of PCA, or symptoms of other cortical vision problems,  
49 as patients could identify the full image but not the fragmented one. More generally, the  
50 clinicians felt that simpler, shorter objective tests appeared to be generally more accessible  
51 to the patient participants than more complex, longer or more subjective ones. The benefit of  
52 support from partners within the examination environment itself was also clear.  
53  
54

55 A key priority for patients and their partners was that systems were in place to facilitate early  
56 identification of cortical perceptual problems and to have these referred into the appropriate  
57 secondary care service to enable a clear diagnosis of PCA (or other neurological condition  
58 causing the problem) to be confirmed. This meant that a consistent approach was needed  
59 across optometry, ophthalmology and neurology, with effective and prompt communication  
60

1  
2  
3 and referrals between clinicians, to prevent excessive and unnecessary delay in diagnosis.  
4 These concerns were echoed by the clinical professionals who acknowledged the difficulty  
5 many health professionals, would currently be likely to have in making clear discriminations  
6 between optical / ocular and cortical vision problems.  
7

8  
9 The test process needs to be flexible enough to accommodate atypical patient responses,  
10 and needs to take account of these patients' fatigue in general, and also their frustration with  
11 not being able to do things that were once normal everyday skills.  
12

13 The professional participants in this explorative research project strongly agreed that future  
14 research should clarify numbers with PCA, establish cross-profession knowledge and skills  
15 in this area, and work on further screening tests for PCA, and although limited in scope and  
16 execution, the project supports existing evidence that there are suitable eye examination  
17 tests that people with dementia can engage with and complete.  
18  
19

## 20 **Recommendations**

21  
22 The outcomes from this project suggested that there were a number of recommendations  
23 which could be taken forwards.  
24

- 25  
26 1. Refine and simplify optometric and ophthalmological tests to make them more  
27 effective for patients with PCA or dementia more widely, and undertake research to  
28 find out how these work in practice with larger and more varied cohorts of patients.  
29
- 30  
31 2. Include the full and fragmented letters test and related tests from the Queen Square  
32 Screening Test for Visual Deficits [17] used by neurologists as part of the research  
33 outlined in point 1, and examine their effectiveness in differentiating between optical /  
34 ocular and cortical vision problems (caused by conditions such as PCA) in order to  
35 develop understanding of their potential to aid clinicians in primary and secondary  
36 care settings to discriminate between visual problems with optical / ocular causes  
37 and those with cortical causes.  
38
- 39  
40 3. Develop professional learning materials to raise awareness of PCA.  
41
- 42  
43 4. Develop concise resources for patients with dementia so they can make the most of  
44 their eye test.  
45
- 46  
47 5. Review previous research to identify what indications there are about the prevalence  
48 of PCA in the UK.  
49

## 50 **Author contributions:**

51 All of the co-authors were involved from the outset in the design and development of the  
52 project and the research protocol. Michael Bowen co-drafted the manuscript with Harry  
53 Zutshi and reviewed and approved the final draft for submission. Martin Cordiner re-drafted  
54 the manuscript and approved the final draft for submission. Sebastian Crutch reviewed drafts  
55 of the manuscript and approved the final draft for submission. Timothy Shakespeare  
56 reviewed drafts of the manuscript and approved the final draft for submission. Harry Zutshi  
57 undertook the interviews and led the Focus Group as part of the project, co-drafted the  
58 manuscript and reviewed and approved the final draft for submission.  
59  
60

### **Acknowledgements:**

The research team would like to thank all of the participants in the project – people living with PCA, family members who supported them to take part, and the clinicians who took part. We would also like to acknowledge the contributions made by members of the UCL PCA Support Group, who provided advice on the initial development of the research question and on the feasibility of the proposed approach to the project / project design.

The team would also like to acknowledge the support provided by Topcon UK through the generous loan of items of optometric equipment.

The generous assistance of Mycal Miller, who filmed all of the participant interviews and sight testing is also gratefully acknowledged.

### **Funding**

University College London funded this study through supporting the staff that undertook the project, and providing the venue and the catering.

The College of Optometrists funded this study through supporting the staff that undertook the project, and paying for the delivery of relevant equipment, the transcribing of recordings, the consultant's time in undertaking interviews and analysing the results, and the relevant expenses of the practitioners.

Tim Shakespeare was supported by an Alzheimer's Research UK Research Fellowship.

Sebastian Crutch was supported by a grant from ESRC/NIHR (ES/L001810/1).

## References

- [1] Mendez M, F, Ghajariania M, Perryman K, M, (2002) Posterior Cortical Atrophy: Clinical Characteristics and Differences Compared to Alzheimer's Disease. *Dement Geriatr Cogn Disord*;14:33-40.
- [2] Rizzo M, Vecera, S.P. (2002) Psychoanatomical substrates of Bálint's syndrome *J Neuro/Neurosurg Psychiatry* 2002;72:162-178.
- [3] Tang-Wai, D. F. Graff-Radford, N.R. Boeve, B. F. Dickson, D. W. Parisi, J. E. Crook, R. Caselli, R. J. Knopman, D. S. Petersen, R. C. (2004) 'Clinical, genetic, and neuropathologic characteristics of posterior cortical atrophy'. *Neurology Oct* 2004, 63 (7) 1168-1174; DOI:10.1212/01.WNL.0000140289.18472.15.
- [4] Crutch SJ, Schott JM, Rabinovici GD, Murray M, Snowden JS, van der Flier WM, Dickerson BC, Vandenberghe R, Ahmed S, Bak TH, Boeve BF, Butler C, Cappa SF, Ceccaldi M, de Souza LC, Dubois B, Felician O, Galasko D, Graff-Radford J, Graff-Radford NR, Hof PR, Krolak-Salmon P, Lehmann M, Magnin E, Mendez MF, Nestor PJ, Onyike CU, Pelak VS, Pijnenburg Y, Primatovo S, Rossor MN, Ryan NS, Scheltens P, Shakespeare TJ, Suárez González A, Tang-Wai DF, Yong KX, Carrillo M, Fox NC; Alzheimer's Association ISTAART Atypical Alzheimer's Disease and Associated Syndromes Professional Interest Area. Consensus classification of posterior cortical atrophy. *Alzheimer's & Dementia* 2017. pii: S1552-5260(17)30040-7. doi: 10.1016/j.jalz.2017.01.014.
- [5] Snowden, J. S. Stopford, C. L. Julien, C. L. Thompson, J.C. Davidson, Y. Gibbons, L. Pritchard, A. Lendon, C. L. Richardson, A. M. Varma, A. Neary, D. Mann, D.M. A. (2007) Cognitive Phenotypes in Alzheimer's Disease and Genetic Risk, *Cortex*, Volume 43, Issue 7, 2007, Pages 835-845, ISSN 0010-9452, [https://doi.org/10.1016/S0010-9452\(08\)70683-X](https://doi.org/10.1016/S0010-9452(08)70683-X).
- [6] Galton CJ<sup>1</sup>, Patterson K, Xuereb JH, Hodges JR. (2000) 'Atypical and typical presentations of Alzheimer's disease: a clinical, neuropsychological, neuroimaging and pathological study of 13 cases.' *Brain*. 2000 Mar;123 Pt 3:484-98.
- [7] Schott, J. M. et al. (2016) 'Genetic risk factors for the posterior cortical atrophy variant of Alzheimer's disease'. *Alzheimer's & Dementia: The Journal of the Alzheimer's Association* , Volume 12 , Issue 8 , 862 - 871. DOI: <https://doi.org/10.1016/j.jalz.2016.01.010>.
- [8] Yong, K. X. X.; Shakespeare, T. J.; Cash, D.; Henley, S. M. D.; Warren, J.D.; Crutch, S. J. (2014) (Con)text-specific effects of visual dysfunction on reading in posterior cortical atrophy'. *Cortex*, Volume 57, 2014, Pages 92-106, ISSN 0010-9452, <https://doi.org/10.1016/j.cortex.2014.03.010>. (<http://www.sciencedirect.com/science/article/pii/S001094521400104X>)
- [9] Zakzanis, K. K.; Kielar, A; Young, D. A.; Boulos, M. (2001) ' Neuropsychological differentiation of late onset schizophrenia and frontotemporal dementia.' *Cognitive Neuropsychiatry*, Volume 6, Number 1, 1 February 2001, pp. 63-77(15). *Routledge, part of the Taylor & Francis Group*. DOI: <https://doi.org/10.1080/13546800042000052>.
- [10] Crutch, S. J., Lehmann, M., Schott, J. M., Rabinovici, G. D., Rossor, M. N., & Fox, N. C. (2012). Posterior cortical atrophy. *The Lancet Neurology*, 11(2), 170–178.

- 1  
2  
3 [11] Kitzinger J. Qualitative research: introducing focus groups. *BMJ* 1995;311:299–302.  
4  
5 [12] Owsley C, McGwin G, Scilley K, et al. Perceived barriers to care and attitudes about  
6 vision and eye care: focus groups with older African Americans and eye care providers.  
7 *Invest Ophthalmol Vis Sci* 2006;47:2797–802.  
8  
9 [13] Lacey J, Cate H, Broadway D. Barriers to adherence with glaucoma medications: a  
10 qualitative research study. *Eye* 2008;23:924–32  
11  
12 [14] Laine C, Davidoff F, Lewis CE, et al. Important elements of outpatient care: a  
13 comparison of patients' and physicians' opinions. *Ann Intern Med* 1996;125:640–5.  
14  
15 [15] University College, London Rare Dementias Group – PCA support group -  
16 [www.raredementiasupport.org](http://www.raredementiasupport.org)  
17  
18 [16] Queen Square tests for visual and cognitive deficits (Green Book and Blue Book) are  
19 available here: [https://onlinestore.ucl.ac.uk/product-catalogue/faculty-of-brain-sciences-](https://onlinestore.ucl.ac.uk/product-catalogue/faculty-of-brain-sciences-c07/ucl-institute-of-neurology-d07/d07-the-queen-square-screening-test-for-visual-deficits)  
20 [c07/ucl-institute-of-neurology-d07/d07-the-queen-square-screening-test-for-visual-deficits.](https://onlinestore.ucl.ac.uk/product-catalogue/faculty-of-brain-sciences-c07/ucl-institute-of-neurology-d07/d07-the-queen-square-screening-test-for-visual-deficits)  
21  
22 [17] Tong, A. Sainsbury, P. and Craig, J. (2007) Consolidated criteria for reporting qualitative  
23 research (COREQ): a 32-item checklist for interviews and focus groups *International*  
24 *Journal for Quality in Health Care*, Volume 19, Issue 6, 1 December 2007, Pages 349–  
25 357, <https://doi.org/10.1093/intqhc/mzm042>  
26  
27 [18] O'Brien BC, Harris IB, Beckman TJ, Reed DA, Cook DA. Standards for reporting  
28 qualitative research: a synthesis of recommendations. *Academic Medicine*, Vol. 89, No. 9 /  
29 Sept 2014 DOI: 10.1097/ACM.0000000000000388  
30  
31 [19] Bowen M, Edgar DF, Hancock B, Haque S, Shah R, Buchanan S, et al. The Prevalence  
32 of Visual Impairment in People with Dementia (the ProVIDe study): a cross sectional study  
33 of 60-89 year old people with dementia and qualitative exploration of individual, carer and  
34 professional perspectives. *Health Serv Deliv Res*2016;4(21)  
35  
36 [20] Pope C, Ziebland S, Mays N. Qualitative research in health care:  
37 analysing qualitative data. *BMJ* 2000;320:114.  
38  
39 [21] Pope C, Ziebland S, Mays N. Qualitative research in health care:  
40 analysing qualitative data. *BMJ* 2000;320:114.  
41  
42 [22] Glen FC, Baker H, Crabb DP. A qualitative investigation into patients' views on visual  
43 field testing for glaucoma monitoring. *BMJ Open* 2014;4:e003996. doi:10.1136/bmjopen-  
44 2013-003996.  
45  
46 [23] American Macular degeneration Foundation – Amsler Chart -  
47 <https://www.macular.org/amsler-chart>  
48  
49 [24] Pelak, V. S., Smyth, S. F., Boyer, P. J., & Filley, C. M. (2011). Computerized visual field  
50 defects in posterior cortical atrophy. *Neurology*, 77(24), 2119–2122.  
51  
52 [25] Faes, L., Bodmer, N. S., Bachmann, L. M., Thiel, M. A., & Schmid, M. K. (2014).  
53 Diagnostic accuracy of the Amsler grid and the preferential hyperacuity perimetry in the  
54 screening of patients with age-related macular degeneration: systematic review and meta-  
55 analysis. *Eye*, 28(7), 788–796. <http://doi.org/10.1038/eye.2014.104>  
56  
57  
58  
59  
60

1  
2  
3  
4 [26] Beh SC, Muthusamy B, Calabresi P, *et al* (2014) Hiding in plain sight: a closer look at  
5 posterior cortical atrophy *Practical Neurology* Published Online First: 12 September  
6 2014. doi: 10.1136/practneurol-2014-000883  
7  
8  
9  
10  
11  
12  
13  
14  
15  
16  
17  
18  
19  
20  
21  
22  
23  
24  
25  
26  
27  
28  
29  
30  
31  
32  
33  
34  
35  
36  
37  
38  
39  
40  
41  
42  
43  
44  
45  
46  
47  
48  
49  
50  
51  
52  
53  
54  
55  
56  
57  
58  
59  
60

For peer review only

1  
2  
3  
4  
5  
6  
7  
8  
9  
10  
11  
12  
13  
14  
15  
16  
17  
18  
19  
20  
21  
22  
23  
24  
25  
26  
27  
28  
29  
30  
31  
32  
33  
34  
35  
36  
37  
38  
39  
40  
41  
42  
43  
44  
45  
46  
47  
48  
49  
50  
51  
52  
53  
54  
55  
56  
57  
58  
59  
60



Figure 1: Themes and sub-themes identified in the framework analysis

209x148mm (300 x 300 DPI)



Figure 2 - example of a fragmented letter

209x148mm (300 x 300 DPI)



## Standards for Reporting Qualitative Research (SRQR)\*

<http://www.equator-network.org/reporting-guidelines/srqr/>

Page/line no(s).

### Title and abstract

|                                                                                                                                                                                                                                                              |        |
|--------------------------------------------------------------------------------------------------------------------------------------------------------------------------------------------------------------------------------------------------------------|--------|
| <p><b>Title</b> - Concise description of the nature and topic of the study Identifying the study as qualitative or indicating the approach (e.g., ethnography, grounded theory) or data collection methods (e.g., interview, focus group) is recommended</p> | Page 1 |
| <p><b>Abstract</b> - Summary of key elements of the study using the abstract format of the intended publication; typically includes background, purpose, methods, results, and conclusions</p>                                                               | Page 2 |

### Introduction

|                                                                                                                                                                     |             |
|---------------------------------------------------------------------------------------------------------------------------------------------------------------------|-------------|
| <p><b>Problem formulation</b> - Description and significance of the problem/phenomenon studied; review of relevant theory and empirical work; problem statement</p> | Pages 2 - 3 |
| <p><b>Purpose or research question</b> - Purpose of the study and specific objectives or questions</p>                                                              | Pages 3 - 4 |

### Methods

|                                                                                                                                                                                                                                                                                                                                                                                                             |                     |
|-------------------------------------------------------------------------------------------------------------------------------------------------------------------------------------------------------------------------------------------------------------------------------------------------------------------------------------------------------------------------------------------------------------|---------------------|
| <p><b>Qualitative approach and research paradigm</b> - Qualitative approach (e.g., ethnography, grounded theory, case study, phenomenology, narrative research) and guiding theory if appropriate; identifying the research paradigm (e.g., postpositivist, constructivist/ interpretivist) is also recommended; rationale**</p>                                                                            | Pages 4, 9 and 10   |
| <p><b>Researcher characteristics and reflexivity</b> - Researchers' characteristics that may influence the research, including personal attributes, qualifications/experience, relationship with participants, assumptions, and/or presuppositions; potential or actual interaction between researchers' characteristics and the research questions, approach, methods, results, and/or transferability</p> | Pages 1,5, 6 and 10 |
| <p><b>Context</b> - Setting/site and salient contextual factors; rationale**</p>                                                                                                                                                                                                                                                                                                                            | Page 6              |
| <p><b>Sampling strategy</b> - How and why research participants, documents, or events were selected; criteria for deciding when no further sampling was necessary (e.g., sampling saturation); rationale**</p>                                                                                                                                                                                              | Page 5              |
| <p><b>Ethical issues pertaining to human subjects</b> - Documentation of approval by an appropriate ethics review board and participant consent, or explanation for lack thereof; other confidentiality and data security issues</p>                                                                                                                                                                        | Page 5              |
| <p><b>Data collection methods</b> - Types of data collected; details of data collection procedures including (as appropriate) start and stop dates of data collection and analysis, iterative process, triangulation of sources/methods, and modification of procedures in response to evolving study findings; rationale**</p>                                                                             | Pages 4, 5, 6, 7    |

|                       |                                                                                                                                                                                                                                                       |                  |
|-----------------------|-------------------------------------------------------------------------------------------------------------------------------------------------------------------------------------------------------------------------------------------------------|------------------|
| 1<br>2<br>3<br>4<br>5 | <b>Data collection instruments and technologies</b> - Description of instruments (e.g., interview guides, questionnaires) and devices (e.g., audio recorders) used for data collection; if/how the instrument(s) changed over the course of the study | Pages 4, 5, 6, 7 |
| 6<br>7<br>8           | <b>Units of study</b> - Number and relevant characteristics of participants, documents, or events included in the study; level of participation (could be reported in results)                                                                        | Pages 6, 7, 8, 9 |
| 9<br>10<br>11<br>12   | <b>Data processing</b> - Methods for processing data prior to and during analysis, including transcription, data entry, data management and security, verification of data integrity, data coding, and anonymization/de-identification of excerpts    | Pages 8 and 9    |
| 13<br>14<br>15<br>16  | <b>Data analysis</b> - Process by which inferences, themes, etc., were identified and developed, including the researchers involved in data analysis; usually references a specific paradigm or approach; rationale**                                 | Pages 8 and 9    |
| 17<br>18<br>19<br>20  | <b>Techniques to enhance trustworthiness</b> - Techniques to enhance trustworthiness and credibility of data analysis (e.g., member checking, audit trail, triangulation); rationale**                                                                | Page 8           |

## Results/findings

|                      |                                                                                                                                                                                                   |                |
|----------------------|---------------------------------------------------------------------------------------------------------------------------------------------------------------------------------------------------|----------------|
| 23<br>24<br>25<br>26 | <b>Synthesis and interpretation</b> - Main findings (e.g., interpretations, inferences, and themes); might include development of a theory or model, or integration with prior research or theory | Pages 8, 9, 10 |
| 27<br>28<br>29       | <b>Links to empirical data</b> - Evidence (e.g., quotes, field notes, text excerpts, photographs) to substantiate analytic findings                                                               | Pages 9 to 15  |

## Discussion

|                                  |                                                                                                                                                                                                                                                                                                                                                                                                             |               |
|----------------------------------|-------------------------------------------------------------------------------------------------------------------------------------------------------------------------------------------------------------------------------------------------------------------------------------------------------------------------------------------------------------------------------------------------------------|---------------|
| 32<br>33<br>34<br>35<br>36<br>37 | <b>Integration with prior work, implications, transferability, and contribution(s) to the field</b> - Short summary of main findings; explanation of how findings and conclusions connect to, support, elaborate on, or challenge conclusions of earlier scholarship; discussion of scope of application/generalizability; identification of unique contribution(s) to scholarship in a discipline or field | Pages 9 to 15 |
| 38<br>39                         | <b>Limitations</b> - Trustworthiness and limitations of findings                                                                                                                                                                                                                                                                                                                                            | Page 15       |

## Other

|                |                                                                                                                                               |         |
|----------------|-----------------------------------------------------------------------------------------------------------------------------------------------|---------|
| 42<br>43<br>44 | <b>Conflicts of interest</b> - Potential sources of influence or perceived influence on study conduct and conclusions; how these were managed | Page 16 |
| 45<br>46       | <b>Funding</b> - Sources of funding and other support; role of funders in data collection, interpretation, and reporting                      | Page 16 |

\*The authors created the SRQR by searching the literature to identify guidelines, reporting standards, and critical appraisal criteria for qualitative research; reviewing the reference lists of retrieved sources; and contacting experts to gain feedback. The SRQR aims to improve the transparency of all aspects of qualitative research by providing clear standards for reporting qualitative research.

1  
2  
3  
4  
5  
6  
7  
8  
9  
10  
11  
12  
13  
14  
15  
16  
17  
18  
19  
20  
21  
22  
23  
24  
25  
26  
27  
28  
29  
30  
31  
32  
33  
34  
35  
36  
37  
38  
39  
40  
41  
42  
43  
44  
45  
46  
47  
48  
49  
50  
51  
52  
53  
54  
55  
56  
57  
58  
59  
60

\*\*The rationale should briefly discuss the justification for choosing that theory, approach, method, or technique rather than other options available, the assumptions and limitations implicit in those choices, and how those choices influence study conclusions and transferability. As appropriate, the rationale for several items might be discussed together.

**Reference:**

O'Brien BC, Harris IB, Beckman TJ, Reed DA, Cook DA. **Standards for reporting qualitative research: a synthesis of recommendations.** *Academic Medicine*, Vol. 89, No. 9 / Sept 2014  
DOI: 10.1097/ACM.0000000000000388

For peer review only
